1 **Title:** Genomic insights into the host specific adaptation of the *Pneumocystis* genus and  
2 emergence of the human pathogen *Pneumocystis jirovecii*

3

4 **Short title:** *Pneumocystis* fungi adaptation to mammals

5

6 **Authors:** Ousmane H. Cissé<sup>1\*†</sup>, Liang Ma<sup>1\*†</sup>, John P. Dekker<sup>2,3</sup>, Pavel P. Khil<sup>2,3</sup>, Jung-Ho  
7 Youn<sup>3</sup>, Jason M. Brenchley<sup>4</sup>, Robert Blair<sup>5</sup>, Bapi Pahar<sup>5</sup>, Magali Chabé<sup>6</sup>, Koen K.A. Van  
8 Rompay<sup>7</sup>, Rebekah Keesler<sup>7</sup>, Antti Sukura<sup>8</sup>, Vanessa Hirsch<sup>9</sup>, Geetha Kutty<sup>1</sup>, Yueqin Liu  
9 <sup>1</sup>, Peng Li<sup>10</sup>, Jie Chen<sup>10</sup>, Jun Song<sup>11</sup>, Christiane Weissenbacher-Lang<sup>12</sup>, Jie Xu<sup>11</sup>, Nathan  
10 S. Upham<sup>13</sup>, Jason E. Stajich<sup>14</sup>, Christina A. Cuomo<sup>15</sup>, Melanie T. Cushion<sup>16</sup> and Joseph  
11 A. Kovacs<sup>1\*</sup>

12

13 **Affiliations:** <sup>1</sup> Critical Care Medicine Department, NIH Clinical Center, National  
14 Institutes of Health, Bethesda, Maryland, USA. <sup>2</sup> Bacterial Pathogenesis and  
15 Antimicrobial Resistance Unit, National Institute of Allergy and Infectious Diseases,  
16 National Institutes of Health, Bethesda, Maryland, USA. <sup>3</sup> Department of Laboratory  
17 Medicine, NIH Clinical Center, National Institutes of Health, Bethesda, Maryland, USA.  
18 <sup>4</sup> Laboratory of Viral Diseases, National Institute of Allergy and Infectious Diseases,  
19 National Institutes of Health, Bethesda, Maryland, USA. <sup>5</sup> Tulane National Primate  
20 Research Center, Tulane University, New Orleans, Louisiana, USA. <sup>6</sup> Univ. Lille, CNRS,  
21 Inserm, CHU Lille, Institut Pasteur de Lille, U1019-UMR 9017-CIIL-Centre d'Infection  
22 et d'Immunité de Lille, Lille, France. <sup>7</sup> California National Primate Research Center,  
23 University of California, Davis, California, USA. <sup>8</sup> Department of Veterinary Pathology,

24 Faculty of Veterinary Medicine, University of Helsinki, Helsinki, Finland. <sup>9</sup> Laboratory  
25 of Molecular Microbiology, National Institute of Allergy and Infectious Disease,  
26 National Institutes of Health, Bethesda, Maryland, USA. <sup>10</sup> Department of Respiratory  
27 and Critical Care Medicine, the First Affiliated Hospital of Chongqing Medical  
28 University, Chongqing, China. <sup>11</sup> Center for Advanced Models for Translational Sciences  
29 and Therapeutics, University of Michigan Medical Center, University of Michigan  
30 Medical School, Ann Arbor, MI, United States. <sup>12</sup> Institute of Pathology and Forensic  
31 Veterinary Medicine, Department of Pathobiology, University of Veterinary Medicine  
32 Vienna, Vienna, Austria. <sup>13</sup> Arizona State University, School of Life Sciences, Tempe,  
33 Arizona, USA. <sup>14</sup> Department of Microbiology and Plant Pathology and Institute for  
34 Integrative Genome Biology, University of California, Riverside, Riverside-California,  
35 Riverside, USA. <sup>15</sup> Broad Institute of Harvard and Massachusetts Institute of Technology,  
36 Cambridge, Massachusetts, USA. <sup>16</sup> Department of Internal Medicine, College of  
37 Medicine, University of Cincinnati, Cincinnati, OH, USA.

38 † These authors contributed equally to this work. \* Correspondence and requests for  
39 materials should be addressed to O.H.C ([ousmane.cisse@nih.gov](mailto:ousmane.cisse@nih.gov)) or L.M  
40 ([mal3@nih.gov](mailto:mal3@nih.gov)) or J.A.K ([jkovacs@nih.gov](mailto:jkovacs@nih.gov)).

41

42

43

44

45 **Abstract:** *Pneumocystis jirovecii*, the fungal agent of human *Pneumocystis* pneumonia, is  
46 closely related to macaque *Pneumocystis*. Little is known about other *Pneumocystis*  
47 species in distantly related mammals, none of which are capable of establishing infection  
48 in humans. The molecular basis of host specificity in *Pneumocystis* remains unknown as  
49 experiments are limited due to an inability to culture any species *in vitro*. To explore  
50 *Pneumocystis* evolutionary adaptations, we have sequenced the genomes of species  
51 infecting macaques, rabbits, dogs and rats and compared them to available genomes of  
52 species infecting humans, mice and rats. Complete whole genome sequence data enables  
53 analysis and robust phylogeny, identification of important genetic features of the host  
54 adaptation, and estimation of speciation timing relative to the rise of their mammalian  
55 hosts. Our data reveals novel insights into the evolution of *P. jirovecii*, the sole member  
56 of the genus able to infect humans.  
57

58

59 **MAIN TEXT**

60 **Introduction**

61 The evolutionary history of *Pneumocystis jirovecii*, a fungus that causes life-threatening  
62 pneumonia in immunosuppressed patients such as those with HIV infection, has been  
63 poorly defined. *P. jirovecii* is derived from a much broader group of host-specific  
64 parasites that infect all mammals studied to date. Until recently, *P. carinii* and *P. murina*  
65 (which infect rats and mice, respectively) were the only other species in this genus for  
66 which biological specimens suitable for whole genome sequencing were readily  
67 available. Inter-species inoculation studies have found that a given *Pneumocystis* species  
68 can only infect a unique mammalian species (1, 2). Further, rats are the only mammals  
69 known to be coinfecting by at least two distinct *Pneumocystis* species (*P. carinii* and *P.*  
70 *wakefieldiae*) (3). Within the *Pneumocystis* genus, *P. jirovecii* is the only species able to  
71 infect and reproduce in humans, although the molecular mechanisms of its host  
72 adaptation remain elusive.

73 Previous efforts to reconstruct the evolutionary history of *Pneumocystis* have  
74 estimated the origins of the genus at a minimum of 100 million years ago (mya) (4).  
75 Using a partial transcriptome of *P. macacae*, the *Pneumocystis* species that infects  
76 macaques, we recently estimated that *P. jirovecii* diverged from the common ancestor of  
77 *P. macacae* around ~62 mya (5), which substantially precedes the human-macaque split  
78 of ~20 mya ago (6). Population bottlenecks in *P. jirovecii* and *P. carinii* at 400,000 and  
79 16,000 years ago, respectively (5), are also not concordant with population expansions in  
80 modern humans (~200,000 y ago (7)) and rats (~10,000 y ago (8)), which suggests a



81 decoupled coevolution between *Pneumocystis* and their hosts. This was the first evidence  
82 that *Pneumocystis* may not be strictly co-evolving with their mammalian hosts as  
83 suggested by ribosomal RNA-based maximum phylogenies (9). A molecular clock has  
84 not been tested in any of these phylogenies. A strict co-evolution hypothesis was further  
85 challenged by evidence showing relaxation of the host specificity in *Pneumocystis*  
86 infecting rodents (10, 11). However, the accuracy of speciation times is limited without  
87 the complete genomes of additional species including that of *P. macacae*, the closest  
88 living sister species to *P. jirovecii* identified to date.

89         The absence of long-term *in vitro* culture methods or animal models for most  
90 *Pneumocystis* species has precluded obtaining sufficient DNA for full genome  
91 sequencing and has hindered investigation of the *Pneumocystis* genus. So far, only the  
92 genomes of human *P. jirovecii* (12, 13), rat *P. carinii* (13, 14) and mouse *P. murina*, (13)  
93 are available. These data have provided important insights into the evolution of this  
94 genus, including a substantial genome reduction (12, 13), the presence of intron-rich  
95 genes possibly contributing to transcriptome complexity, and a significant expansion of a  
96 highly polymorphic major surface glycoprotein (*msg*) gene superfamily (13), some of  
97 which are important for immune evasion. However, the lack of whole genome sequences  
98 for many species of this genus (particularly the closely related *P. macacae*) has severely  
99 constrained the understanding of the implications of these genome features in  
100 *Pneumocystis* evolution and adaptation to hosts.

101         To further explore the evolutionary history of the *Pneumocystis* genus, and  
102 explore *P. jirovecii* genetic factors that support its adaptation to humans, we sequenced 2  
103 to 6 specimens of four additional species: those that infect macaques (*P. carinii* forma

104 *specialis macacae* hereafter referred to as *P. macacae*), rabbits (*P. oryctolagi*), dogs (*P.*  
105 *carinii* f. sp. *canis* hereafter referred to as *P. canis*) and rats (*P. wakefieldiae*). We  
106 assembled a single representative, nearly full-length genome for three of the species  
107 except in *P. canis*, in which we recovered three distinct genome assemblies that appear to  
108 represent two separate species. We reconstructed a robust phylogeny of *Pneumocystis*  
109 species, estimated their diversification time, and used comparative genomics to identify  
110 unique and shared genomic features. Given that wild mammals may be commonly  
111 exposed to different *Pneumocystis* species in nature, there is a possibility of historical  
112 gene flow among *Pneumocystis* species that we have evaluated.

113

## 114 **Results and Discussion**

### 115 **Direct sequencing of *Pneumocystis*-host mixed samples**

116 We sequenced the genomes of *Pneumocystis* species from infected macaques, rabbits,  
117 dogs and rats (see Methods and Supplementary Methods). Specimens originated from  
118 immunosuppressed animals as a consequence of simian immunodeficiency virus  
119 infection in macaques, corticosteroid treatment (rabbits and rats), or possible congenital  
120 immunodeficiencies (dogs). For each species, we sequenced samples from 2–6 animals  
121 (Supplementary Tables 1 and 2). These data were used to assemble one high quality  
122 consensus, nearly full-length genome assembly for each species except *P. canis* for which  
123 we recovered two nearly full-length assemblies and an additional partial assembly from  
124 separate samples (denoted as A, Ck1 and Ck2). Post assembly mapping revealed a non-  
125 negligible amount of genetic variability among samples, for example the average genome  
126 wide single nucleotide polymorphism (SNP) diversity among six *P. macacae* isolates is ~

127 12%. The genome of *P. macacae* was sequenced using Oxford Nanopore long reads and  
128 Illumina short read sequences, whereas the other *Pneumocystis* were sequenced only with  
129 Illumina (Supplementary Tables 2 and 3). The new *Pneumocystis* genome assemblies  
130 range from 7.3 Mb in *P. wakefieldiae* to 8.2 Mb in *P. macacae*. The *P. macacae* and *P.*  
131 *wakefieldiae* genome assemblies consist of 16 and 17 scaffolds, respectively, both of  
132 which are highly contiguous and approach the chromosomal level based on similarities  
133 with published karyotypes (3, 15) and/or the presence of *Pneumocystis* telomere repeats  
134 (16) at the scaffold ends (Supplementary Table 3). The genome assemblies of *P.*  
135 *oryctolagi* and *P. canis* (assemblies A, Ck1 and Ck2) are less contiguous with 38, 33, 78  
136 and 315 scaffolds, respectively. All these assemblies except for the partial assembly of *P.*  
137 *canis* Ck2 have very similar total sizes (7.3 – 8.2 Mb) comparable to previously  
138 sequenced genomes of *P. jirovecii*, *P. carinii* and *P. murina*, all of which are at or near  
139 chromosomal-level with a size of 7.4 – 8.3 Mb (Supplementary Table 3). The genome  
140 assemblies are all AT-rich (~71%) and ~3% encodes DNA transposons and  
141 retrotransposons (Supplementary Table 3). We also assembled complete mitochondrial  
142 genomes from all species in this study, which are similar in size (21.2 – 24.5 kilobases) to  
143 published rodent *Pneumocystis* mitogenomes (24.6 – 26.1 kb) (17) but smaller than that  
144 of *P. jirovecii* (~35 kb) (17) (Supplementary Table 3). *P. macacae* has a circular  
145 mitogenome similar to *P. jirovecii* (17) whereas all other sequenced species have linear  
146 mitogenomes.

147

148

149

150 **Genomic differences among *Pneumocystis* species**

151 To assess the extent of genome structure variations among species, we generated whole  
152 genome alignment of all representative genome assemblies. We found high levels of  
153 interspecies rearrangements ranging from 10 breakpoints between *P. wakefieldiae* and *P.*  
154 *murina* to 142 between *P. jirovecii* and *P. oryctolagi* (Fig. 1; Supplementary Table 4).  
155 The vast majority of chromosomal rearrangements were inversions, which, for example  
156 accounted for 23 out of 29 breakpoints between *P. jirovecii* and *P. macacae*  
157 (Supplementary Table 4). Analysis of aligned raw Nanopore and/or Illumina reads back  
158 to the assemblies show no evidence of incorrect contig joins around rearrangement  
159 breakpoints. There are clearly less rearrangements among rodent *Pneumocystis* species  
160 (*P. wakefieldiae*, *P. carinii* and *P. murina*) than among all other species (Fig. 1;  
161 Supplementary Table 4), which is likely due to their younger evolutionary ages and  
162 closer taxonomic relationships of their host species (Figs. 2a and 2c). These  
163 rearrangements could have caused incompatibilities between these species, thus  
164 preventing gene flow, for species that infect the same host.

165 Comparison of pairwise whole genome alignment identities between species  
166 indicates a substantial genetic divergence: 14% dissimilarity in aligned regions between  
167 *P. jirovecii* and *P. macacae*; 21% between *P. jirovecii* and *P. oryctolagi*; 22% between *P.*  
168 *jirovecii* and *P. canis* Ck1; 15% between *P. wakefieldiae* and *P. carinii*; and 12%  
169 between *P. wakefieldiae* and *P. murina* (Supplementary Table 5).

170

171

172

### 173 **Speciation history of the *Pneumocystis* genus**

174 These new complete genome data enabled us to examine the relationships between  
175 different *Pneumocystis* species and to estimate the timing of speciation events that led to  
176 the extant species. We inferred a strongly supported phylogeny of *Pneumocystis* species  
177 rooted with outgroups from distantly related fungal subphyla. Our phylogenomic analysis  
178 of 106 single-copy orthologs inferred from all assemblies including the fragmented Ck2  
179 strongly supports monophyly of *Pneumocystis* species (100% Maximum likelihood  
180 bootstrap values; Fig. 2a), Bayesian posterior probabilities ( $>0.95$ ; Supplementary Figure  
181 1), and highly significant support from the Shimodaira-Hasegawa test (18) ( $p < 0.001$ ;  
182 see Methods). An identical phylogeny was recovered using mitochondrial genome data  
183 from 33 specimens representing 7 *Pneumocystis* (Supplementary Figure 2). However, we  
184 identified unexpected placements of *P. wakefieldiae*, *P. oryctolagi* and *P. canis*. First, *P.*  
185 *wakefieldiae* appears as a sister species of *P. murina* instead of *P. carinii* (which also  
186 infects rats) (Fig. 2b). This observation is supported by the higher similarity in genome  
187 size (Supplementary Table 3), sequence divergence (Supplementary Table 4), genome  
188 structure (Fig. 1; Supplementary Table 5) and higher frequencies of supporting genes  
189 (0.64 in 1718 nuclear gene trees examined; Methods) between *P. wakefieldiae* and *P.*  
190 *murina* than between *P. wakefieldiae* and *P. carinii*. These relationships contradict the  
191 previous phylogenetic placement of *P. wakefieldiae* as an outgroup of the *P. carinii*/*P.*  
192 *murina* clade (9) or a sister species of *P. carinii* (19) based on analysis of mitochondrial  
193 large and small subunit rRNA genes (mtLSU and mtSSU). The new phylogeny also  
194 opposes the prevailing hypothesis for dynamics of host specificity and coevolution within  
195 the *Pneumocystis* genus, that is, *P. wakefieldiae* shares with *P. carinii* the same host

196 species (*Rattus norvegicus*) and thus is expected to be more related to *P. carinii* than to *P.*  
197 *murina*.

198 Similarly, *P. oryctolagi* would be expected to be phylogenetically closer to rodent  
199 *Pneumocystis* than to primate *Pneumocystis*, consistent with the closer phylogenetic  
200 relationships of rabbits and rodents to each other than to primates (20) (Figs. 2a and 2b).  
201 In contrast, *P. oryctolagi* and *P. canis* are more closely related to primate *Pneumocystis*  
202 (*P. jirovecii* and *P. macacae*) than rodent *Pneumocystis* (Fig. 2a; Supplementary Figures  
203 1 and 2; 100% of tree level support in 1,718 nuclear genes). The phylogenetic  
204 discrepancy between *P. oryctolagi* and its host (rabbit) suggests that host switching may  
205 have occurred in their distant history.

206 From whole-genome Bayesian phylogenetic estimates (see Methods), the  
207 common ancestor of all extant species of the genus emerged around 140 mya (confidence  
208 intervals: 180–101 mya; Fig. 2c; Supplementary Figure 1), with a separation of  
209 *Pneumocystis* and *Schizosaccharomyces* genera around 512 mya (CI: 822-203 mya)  
210 which is consistent with independent estimates of the origin of Taphrinomycota crown  
211 group at 530 mya (21). The *Pneumocystis* genus thereafter divided into two main clades,  
212 P1 consisting of *P. jirovecii*, *P. macacae*, *P. oryctolagi* and *P. canis*, and P2 consisting of  
213 species infecting rodents (*P. carinii*, *P. wakefieldiae* and *P. murina*) (Fig. 2b).  
214 Subsequent to the divergence of P1/P2, the clade P1 diversified through a series of  
215 speciation events leading either to new primate or carnivore species whereas P2 remained  
216 localized in rodents. We also found that the divergence time of *Pneumocystis* in the clade  
217 P1 predates that of their hosts, that is, the crown of rodent-rabbit-primate *Pneumocystis* is  
218 clearly more ancient than the corresponding superorder of mammals (Euarchontoglires)

219 (Fig. 2c). The pattern in clade P2 is different as the divergence time estimates overlap  
220 with those of their hosts (Fig. 2c). On the basis of coalescent estimates, *P. jirovecii* began  
221 to split from *P. macacae* at ~62 mya (CI: 69-55 mya) which extended through the  
222 Cretaceous-Paleogene mass extinction event at 66 mya, but substantially predates the  
223 crown Catarrhini (human-macaque ancestor) of ~20 mya (CI: 24-17 mya; Fig. 2c;  
224 Supplementary Figure 1).

225

226 **High levels of population differentiation identified from *Pneumocystis* genomes**  
227 **support reproductive isolation**

228 To understand the genomic divergence landscape of *Pneumocystis* populations, we  
229 performed genome-wide differentiation tests ( $F_{ST}$ , relative population divergence) and  
230 nucleotide diversity ( $\pi$ ) (Methods). These analyses used 32 genomic datasets, including  
231 26 publicly available datasets in GenBank for *P. jirovecii*, *P. carinii* and *P. murina* and 6  
232 datasets generated in this study for other four *Pneumocystis* species (Supplementary Note  
233 1; Supplementary Table 2). Of note *Pneumocystis* organisms from macaque, rat and  
234 rabbit samples are from infected laboratory or domesticated animals (Supplementary  
235 Table 5), and thus do not represent true random representation of natural (e.g. wild)  
236 populations. We used a trained version LAST (22) to account for interspecies divergence  
237 during read mapping and ANGSD (23) to derive genotype likelihoods instead of  
238 genotypes. Since ANGSD's  $F_{ST}$  requires outgroups, we analyzed interspecies divergence  
239 between *P. jirovecii*, *P. macacae* and *P. oryctolagi* populations using a sliding window  
240 approach of 5-kb and *P. carinii* as an outgroup species ( $n$  samples = 59). *P. murina*  
241 genomic divergence relative to *P. carinii* and *P. wakefieldiae* populations was estimated

242 similarly using *P. jirovecii* as an outgroup species ( $n = 47$ ). We found high levels of  
243 population differentiation among *Pneumocystis* specimens; 71.9% of the *P. jirovecii*  
244 genome had a Fixation index ( $F_{ST}$ )  $> 0.8$  compared to the closest species, *P. macacae*,  
245 while 90.2% of the genome had a  $F_{ST} > 0.8$  compared to the extant species *P. oryctolagi*  
246 (Supplementary Figure 3). Similarly, 86.3% and 93.7% of the *P. murina* genome had a  
247  $F_{ST} > 0.8$  compared to *P. carinii* and *P. wakefieldiae*, respectively (Supplementary Note  
248 1).

249

### 250 **Analyzing historical hybridization in *Pneumocystis* genus**

251 Topology-based maximum likelihood analysis of 1,718 gene trees using PhyloNet (33)  
252 found no evidence of statistically significant signals for gene flow among species of clade  
253 P1 (*P. jirovecii*, *P. macacae*, *P. oryctolagi* and *P. canis*) (see Methods; Supplementary  
254 Figure 4), which indicates that these lineages were reproductively isolated throughout  
255 their evolutionary history, consistent with their isoenzyme diversity (34). In contrast, we  
256 found strong evidence of ancient hybridization in clade P2, possibly between *P. carinii*  
257 and *P. wakefieldiae* (Methods; Supplementary Figure 4), which may then have  
258 contributed to the formation of the *P. murina* lineage. We hypothesize that *P. murina*  
259 might have originated as a hybrid between ancestors of *P. carinii* and *P. wakefieldiae* in  
260 rats, and subsequently shifted to mice, possibly owing to the geographic proximity of  
261 ancestral rodent populations (for example in Southern Asia (35)), which is consistent  
262 with the fact that ecological fitting is a major determinant of host switch (36). The  
263 presumed physiological, cellular and/or immunological similarities among closely related  
264 rodent species might also have helped the same *Pneumocystis* species colonizing multiple



265 closely-related rodent hosts (10, 36). The putative host shift might have been required  
266 because of negative selection against *P. murina* specifically in rats, possibly stemming  
267 from competition of low-fitness hybrids with parental species as is frequently observed in  
268 fungal pathogens (37). It is also interesting to note that earlier studies have suggested  
269 competition between *P. carinii* and *P. wakefieldiae* in rat colonies (38), and further, that  
270 *P. wakefieldiae* can no longer be detected in commercial vendors (Cushion et al.  
271 unpublished observation), while *P. carinii* can consistently be identified in laboratory  
272 rats. However, both *P. carinii* and *P. wakefieldiae* can be found, alone or together, in  
273 different species of *Rattus* in Southeast Asia (10).

274

#### 275 **Gene families and metabolic pathways linked to host specificity**

276 Gene annotations of *P. macacae* and *P. wakefieldiae* genomes was performed using  
277 RNA-Seq paired-end reads to guide *ab initio* gene predictions (Methods). *P. oryctolagi*  
278 and *P. canis* genomes were annotated using *ab initio* and homology-based predictions.  
279 The predicted protein-coding gene numbers are similar across *Pneumocystis* genomes and  
280 range from 3,211 in *P. wakefieldiae* to 3,476 in *P. canis* strain Ck1 (Supplementary Table  
281 3). Nearly all predicted protein coding genes in *P. macacae* (96% of 3,471) and *P.*  
282 *wakefieldiae* (99% of 3,221) genomes have RNA-Seq support. Gene models present a  
283 complex architecture with 5.7 to 6.3 exons per gene. High representation of core  
284 eukaryotic genes in *P. macacae*, *P. oryctolagi*, *P. canis* and *P. wakefieldiae* provides  
285 evidence that these genomes are nearly complete and comparable in completeness to *P.*  
286 *jirovecii*, *P. murina* and *P. carinii* genomes: 86.2 to 93.4% of conserved genes are  
287 detectable in all annotated genome assemblies (Supplementary Table 3).

288 Examination of orthologous genes reveals that ~3,100 orthologous clusters had  
289 representative genes from all nine analyzed genome assemblies from seven *Pneumocystis*  
290 species (Supplementary Table 3). We found a small number of unique genes in each  
291 *Pneumocystis* species ranging from 25 in *P. wakefieldiae* to 204 in *P. oryctolagi*  
292 (Supplementary Table 3). Unique genes in most species encode for phylogenetically  
293 unrelated proteins with unknown function. A striking exception is observed in *P.*  
294 *macacae* in which nearly all unique proteins are part of a novel undescribed large protein  
295 family ( $n = 190$ ). The members of this new family are enriched in arginine and glycine  
296 amino acid residues (denoted RG proteins) (Supplementary Figure 5a) and have no  
297 similarities with transposable elements. While RG motifs are often found in eukaryotic  
298 RNA-binding proteins (24), *P. macacae* RGs do not possess an RNA-binding domain  
299 (Pfam domains PF00076, PF08675, PF05670, PF00035), suggesting a different role. In  
300 addition, *P. macacae* RGs lack functional annotation except for two proteins that encode  
301 a Dolichol-phosphate mannosyltransferase domain (PF08285) and a leucine zipper  
302 domain (PF10259), respectively. Of the 190 RGs, 134 have RNA-Seq based gene  
303 expression support, including five among the top highly expressed genes (Supplementary  
304 Figure 5b). Nearly half of RGs are located at subtelomeric regions and often found in  
305 close proximity to *msg* genes (Supplementary Table 6). RG proteins can be grouped in  
306 three main clusters (based on OrthoFinder clustering; Methods), have a reticulate  
307 phylogeny (Supplementary Figure 5c) and a mosaic gene structure (Supplementary  
308 Figure 5d) which suggest frequent gene conversion events. These results suggest that RG  
309 proteins may play important roles in *P. macacae* specific biology. Further experiments  
310 are ongoing to elucidate the functions of these proteins in *P. macacae*.

311 To investigate the gene loss patterns in newly sequenced genomes, we compared  
312 *Pneumocystis* gene catalogs to those of related Taphrinomycotina fungi. We found that  
313 all sequenced *Pneumocystis* species have lost ~40% of gene families present in other  
314 Taphrinomycotina (Supplementary Figure 6), and that the metabolic pathways are also  
315 very similar among *Pneumocystis* species with a few minor (possibly stochastic)  
316 differences (Supplementary Note 2). This strongly suggests that *Pneumocystis* ancestry  
317 experienced massive gene losses that occurred before the genus diversification.

318 To investigate changes in gene content that might explain interspecies differences  
319 among the seven *Pneumocystis* species, we searched for expansions or contractions in  
320 functionally classified gene sets. We identified Pfam domains with significantly uneven  
321 distribution among genomes (Wilcoxon signed-rank test  $p < 0.05$ ). Domains associated  
322 with Msg proteins are enriched in *P. jirovecii* and, to a lesser extent in *P. macacae*  
323 compared to other species (Fig. 3a). Domains associated with peptidases (M16) are  
324 enriched in *P. carinii*, *P. murina* and *P. wakefieldiae*. S8 peptidase family (kexin) is  
325 expanded in *P. carinii* as described previously (13) with 13 copies whereas all other  
326 species have one or three copies (Fig. 3a; Supplementary Figure 7). Although kexin is  
327 localized in other fungi to the Golgi apparatus, and in *Pneumocystis* is believed to be  
328 involved in the processing of Msg proteins, the expanded copies are predicted to be GPI-  
329 anchored proteins, appear to localize to the cell surface; their function is unknown (25).  
330 *P. carinii* and *P. wakefieldiae* have 13 and 3 copies whereas all other *Pneumocystis*  
331 species have only one (Supplementary Figure 7). We found that *P. carinii* kexin genes  
332 evolved under strong positive selection ( $p = 0.008$ ) whereas *P. wakefieldiae* kexin genes  
333 did not ( $p = 0.159$ ).

334 Proteins with CFEM (common in fungal extracellular membrane) domains are  
335 important for the acquisition of vital compounds in fungal pathogens (26). *Pneumocystis*  
336 have an unusual high presence of CFEM domains compared to other Taphrinomycotina;  
337 each species possesses five proteins containing 2 to 6 domains per protein  
338 (Supplementary Figures 8a-c), with no significant differences among different species ( $p$ -  
339 value = 0.057; PF05730.10). Phylogenetic analysis of CFEM domains indicates that  
340 *Pneumocystis* species have experienced significantly higher intragenic duplications rates  
341 relative to other fungi (Supplementary Figure 8b). These results suggest that multiple  
342 CFEM domains were likely already present in the last common ancestor of *Pneumocystis*  
343 and were vertically transmitted.

344 To investigate changes in enzyme gene content that might account for inter-  
345 species differences among *Pneumocystis* species, we searched for enzymes that show  
346 clear differences among species, which are represented by Enzyme Commission numbers  
347 (ECs) (Fig. 3b). We found 34 ECs, which include 14 that are highly conserved in *P.*  
348 *jirovecii* but have a patchy distribution in other members of clade P1 (*P. macacae*, *P.*  
349 *canis* and *P. oryctolagi*) and are lost in clade P2 (*P. carinii*, *P. murina* and *P.*  
350 *wakefieldiae*). Most of these 14 ECs are assigned to the biosynthesis of antibiotics or  
351 secondary metabolites and vitamin B6 metabolism according to KEGG pathways. The  
352 latter pathway seems only functional in P2 clade (Supplementary Note 2).

353

354

355

356

357 **Intron evolution**

358 We analyzed 1,211 one-to-one gene orthologs shared by all sequenced *Pneumocystis* and  
359 other Taphrinomycotina fungi (Supplementary Figure 9a). A total of 9,080 homologous  
360 sites within 1,211 alignments were identified (Supplementary Figure 9b). While intron  
361 densities are similar among *Pneumocystis* species (ranging from 4,842 in *P. macacae* to  
362 5,289 in *P. murina*), they are markedly more elevated compared to related  
363 Taphrinomycotina, including *Neolecta irregularis* ( $n = 4,202$  introns),  
364 *Schizosaccharomyces pombe* ( $n = 862$ ) and *Taphrina deformans* ( $n = 639$ )  
365 (Supplementary Fig. 11b). Predictions of ancestral intron densities show that the  
366 *Pneumocystis* common ancestor had at least 5,341 introns, of which 37% were novel i.e.  
367 not found in other Taphrinomycotina (Supplementary Figure 9c). This is in contrast to  
368 other fungi; ~26% of *Neolecta* introns were independently acquired whereas *S. pombe*  
369 and *T. deformans* genomes have experienced significant intron losses, which is consistent  
370 with previous studies (31, 32). These results suggest the emergence of *Pneumocystis*  
371 genus was preceded by a significant amount of intron gain.

372

373 **Positive selection footprints in *P. jirovecii* genes**

374 We tested the hypothesis that *P. jirovecii* has adapted specifically to humans after its  
375 separation with *P. macacae*, and that there will be footprints of directional selection in  
376 the genome that point to the molecular mechanisms of this adaptation. To infer *P.*  
377 *jirovecii*-specific adaptive changes, we compared the *P. jirovecii* one-to-one orthologs to  
378 those of *P. macacae* and *P. oryctolagi* using the branch-site likelihood ratio test (39).  
379 Positive selection was identified as an accelerated non-synonymous substitution rate. The

380 test identified 244 genes (out of 2,466) with a signature of positive selection in the human  
381 pathogen *P. jirovecii* alone (Bonferroni corrected  $p$ -value  $< 0.05$ ; Supplementary Table  
382 7). Gene Ontology enrichment analysis of these genes with accelerate rates identified  
383 significant enrichment for the biological process “cellular response to stress” (adjusted  
384 using Benjamini-Hochberg  $p$ -value  $= 1.9 \times 10^{-6}$ ) and the molecular function “potassium  
385 channel regulator activity” ( $p = 2.8 \times 10^{-10}$ ). Among the 244 genes, 197 are conserved in  
386 all *Pneumocystis* genomes available whereas 47 are absent in clade P2 only (*P. carinii*, *P.*  
387 *murina* and *P. wakefieldiae*; Fig. 2b). While the latter set of genes encode proteins of  
388 unknown function, analysis of Pfam domains shows a significant enrichment in the  
389 biological process “nucleoside phosphate biosynthetic” process ( $p = 9.9 \times 10^{-5}$ ) and the  
390 molecular function “carbon-nitrogen lyase activity” ( $p = 2.8 \times 10^{-10}$ ). Further  
391 investigations will be required to determine the precise functions of these genes.

392

### 393 **Subtelomeric gene families**

394 Until recently, the only in-depth data on the subtelomeric gene families in *Pneumocystis*  
395 have come from the *P. jirovecii*, *P. carinii* and *P. murina* (13, 40). These genes, including  
396 *msg* and *kexin*, are believed to be important for antigenic variation, and are well  
397 represented in the assemblies of *P. macacae*, *P. oryctolagi*, *P. canis* and *P. wakefieldiae*.  
398 We provide a comprehensive analysis of their composition and evolution that  
399 complements our recent publication (41).

400 *P. macacae* subtelomeres encode numerous arrays of *Msg* and *RG* proteins  
401 (Supplementary Table 7). Phylogenetic analysis of adjacent genes revealed only a few  
402 instances of recent paralogs, which suggests that most of the duplications and subsequent

403 positional gene arrangements are ancient. Three *P. macacae* subtelomeric regions have a  
404 nearly perfect synteny in *P. jirovecii* with the only difference being the absence of RG  
405 proteins in *P. jirovecii* (Supplementary Table 7). *P. oryctolagi* subtelomeres tend to be  
406 enriched in orphan genes that are not members of the Msg superfamily, and are of  
407 unknown function. *P. canis* subtelomeres are enriched in Msg-C family (see Msg section  
408 below). *P. wakefieldiae* subtelomeres are enriched in *msg* genes, though their types are  
409 distinct from those of *P. carinii* and *P. murina*.

410

### 411 **Evolution of *msg* genes**

412 Up to 6% of the *Pneumocystis* genomes are comprised of copies of the *msg* superfamily,  
413 which are believed to be crucial mediators of pathogenesis through antigenic variation  
414 and interaction with the host cells. The superfamily is classified into five families A, B,  
415 C, D and E based on protein domain architecture, phylogeny and expression mode (13,  
416 40, 41). The A family is the largest of the five, has been subdivided into three subfamilies  
417 (A1, A2 and A3) and is generally thought to contribute to antigenic variation. Their  
418 protein products contain cysteine-rich domain classified as N1 and M1 to M5.

419 To investigate the origin of *msg* genes, we used previously developed Hidden  
420 Markov Models (13) to search for corresponding gene models in the assemblies of *P.*  
421 *macacae*, *P. oryctolagi*, *P. canis* and *P. wakefieldiae* and combined these data with  
422 previously published *msg* sequences annotated in *P. jirovecii*, *P. carinii* and *P. murina*  
423 genomes (13, 41). Of note, in this study only a subset of *msg* genes were assembled for *P.*  
424 *oryctolagi*, *P. canis* and *P. wakefieldiae* due to difficulties in assembling highly similar  
425 short reads from Illumina sequencing exclusively while a potentially complete set of *msg*  
426 genes were assembled for *P. macacae* using Illumina and Nanopore reads

427 (Supplementary Table 3). The number of full-length *msg* genes available ranges from 9 in  
428 *P. oryctolagi* to 161 in *P. jirovecii*. Sequence-based clustering and phylogenetic analyses  
429 of all *msg* genes ( $n = 482$ ) revealed that: (i) there is no evidence of inter-species transfer  
430 among *Pneumocystis* species (Figs. 4b to d; Supplementary Figure 10), (ii) *msg* genes  
431 may have a polyphyletic origin, i.e. distinct families were present in most recent  
432 ancestors of *Pneumocystis* (Supplementary Figure 10a); (iii) *msg* genes experienced  
433 significant amount of recombination early in their history as estimated by phylogenetic  
434 network analysis (Supplementary Figures 10b and c).

435         The evolution of *msg* genes between clades P1 and P2 is not uniform among  
436 *Pneumocystis* species and instead has clear differences between them. While some gene  
437 expansions are relatively recent (for example, *msg* families A, C and D) other expansions  
438 (*msg* families E and B) occurred before the emergence of *Pneumocystis* genus itself  
439 (Supplementary Figure 11). Subsets of *msg* genes show strong host specific sequence  
440 diversification (Fig. 4a), such as the current A family have emerged relatively recently 43  
441 mya ago (CI: 58-28 mya) compared to the emergence of the genus at 140 mya ago (see  
442 Methods; Supplementary Figure 11). The A1 subfamily displays a substantial expansion  
443 in all species (Fig. 4a) and is subject to significant intra-species recombination (Figs. 4b  
444 to d), which suggest that *Pneumocystis* most recent ancestor may have develop a pre  
445 *Msg-A* family, which then evolved through duplication and recombination after the  
446 separation of species.

447         The A3 subfamily has expanded only in clade P1 (especially in *P. jirovecii*)  
448 whereas A2 has expanded only in clade P2 (*P. carinii*, *P. murina* and to a lesser extent in  
449 *P. wakefieldiae*) (Fig. 4a). Although all members of the A family might have a shared



450 deep ancestry, we found no evidence suggesting that the A1, A2, A3 subfamilies are  
451 directly derived from one another (Supplementary Figure 10).

452 The *msg* B family underwent a net independent expansion in *P. macacae* ( $n = 10$ )  
453 and *P. jirovecii* ( $n = 12$ ), while being reduced to only one copy in *P. oryctolagi* and *P.*  
454 *canis*, and being completely absent in *P. wakefieldiae*, *P. carinii* and *P. murina* (Fig. 4a).  
455 Using Bayesian estimates, we estimated the origin of B family to be older than the  
456 *Pneumocystis* genus itself (~211 versus 140 mya; Supplementary Figure 11). While a half  
457 of the B family members are located in subtelomeric regions in *P. jirovecii* and *P.*  
458 *macacae*, we found no evidence of recent inparalogs, which is consistent with their  
459 ancient origin. B family members lack predicted GPI anchor or transmembrane domain  
460 and have a shorter proline-rich motif compared to other *msg* families. Many of the *msg* B  
461 family members have a predicted secretory signal (13/25), with more in *P. jirovecii* than  
462 in *P. macacae* (7 vs. 3 copies). These data suggest that at least some members of the B  
463 family may be secreted effectors.

464 The *msg* D family is expanded only in *P. macacae* and *P. jirovecii*. The D family  
465 emerged at ~69 mya (CI: 109-40 mya) before the split of these two species  
466 (Supplementary Figure 11), thus suggesting a role in adaptation to primates similar to the  
467 A3 subfamily. In contrast, the E family, which is conserved in all species, is much more  
468 ancient at ~311 mya ago (CI: 541-158 mya), again preceding the emergence of the genus  
469 (Supplementary Figure 11).

470 *P. jirovecii* and *P. macacae* have a significantly larger number of *msg*-associated  
471 cysteine-rich domains than other *Pneumocystis* species (Fig. 5a) and also a much greater  
472 sequence diversity per domain than other *Pneumocystis* species (Fig. 5c). Domain

473 sequences cluster independently, with each cluster containing sequences from all  
474 *Pneumocystis* species (Fig. 5b). Domains M1 and M3 are more closely related to each  
475 other than other domains, which suggests a relatively recent duplication. These results  
476 suggest that the all domains are likely to appear in the *Pneumocystis* ancestor and  
477 underwent a series of lineage specific expansions. The paucity of domains in *P.*  
478 *oryctolagi*, *P. canis* and *P. wakefieldiae* might reflect an interaction with host cells  
479 different than other species. Alternatively, these differences could represent incomplete  
480 sets of Msgs in the former species.

481

## 482 **Conclusions**

483 In the current study, we have produced high-quality genome assemblies and used them to  
484 investigate the speciation and host specific adaptation of multiple members of the  
485 *Pneumocystis* genus. We have established a robust phylogeny, presented genomic  
486 differences among species, identified a possible introgression among rodent-hosted  
487 *Pneumocystis* species, and discovered two phylogenetically distinct *Pneumocystis*  
488 lineages in dogs. Our analysis suggests that successful infection of humans by *P. jirovecii*  
489 has a deep evolutionary root accompanied by important genomic modifications.  
490 Surprisingly, analysis of core genomic regions of nuclear genomes did not identify clear  
491 differences that are suggestive of mechanisms for host-specific adaptation; instead it is  
492 the highly polymorphic multicopy gene families in subtelomeric regions that appear to  
493 account for this adaptation.

494 Based on our analysis, we propose the following series of events for the  
495 emergence and adaptation of *P. jirovecii* as a major human opportunistic pathogen (Fig.

496 6). First, there was a major shift of a pre-*Pneumocystis* lineage (possibly a soil- or plant-  
497 adapted organism) to mammals, which led to a significant genome reduction but with a  
498 significant proliferation of introns and expansions of cysteine-rich domain-containing  
499 proteins involved in immune escape and nutrient scavenging from hosts. *Pneumocystis*  
500 genomes encode multiple gene families that have experienced a rapid accumulation of  
501 mutations favoring fungal replication in mammals. Each *Pneumocystis* species has  
502 employed different strategies to adapt to their host including lineage-specific expansions  
503 of shared gene families such as *msg* A1, A3 and D in *P. jirovecii* or gain and expansion  
504 of RG proteins in *P. macacae*. In addition, some shared gene families also have acquired  
505 different properties (e.g., transmembrane domain and secreted signals) potentially  
506 contributing to host specificity. Our data point to the possibility that chromosomal  
507 rearrangements may play a role in the inhibition of gene flow between *P. jirovecii* and *P.*  
508 *macacae* leading to their speciation. The absence of a reliable culture method and the  
509 inability to genetically manipulate *Pneumocystis* prevents directly testing our model.  
510 Moreover, for the genes that we have now implicated in the process of host adaptation,  
511 only a few have been functionally characterized. Future studies on the role of these genes  
512 will be important to elucidate the molecular basis of in host specific adaptation by  
513 *Pneumocystis* pathogens.

514 By untangling the co-evolution of *Pneumocystis* species with their mammalian  
515 hosts, we show that this evolution is more complex than portrayed by a strict co-  
516 evolutionary framework. The potential relaxation of strict host specificity in small  
517 mammals colonized by *Pneumocystis* could be explained as well by the fact that, in the  
518 coevolution theory, parasites infecting rodents (small-bodied with short lifespans, high

519 reproduction rates, and high population densities) have lower host specificity than those  
520 adapted to long-lived large mammals with more stable population densities (42). Our  
521 analyses documented rare instances of pathogen speciation while sharing the same host  
522 (rats and dogs), which is equivalent to a speciation in sympatry (without geographical  
523 isolation). This work predicts novel and critical aspects of the genetic basis of host  
524 adaptation by *P. jirovecii*, the only fungal pathogen known to have adapted to living  
525 exclusively in human lungs. Future studies further expanding the sampled *Pneumocystis*  
526 genomes across the diversity of mammals, will be key to further understanding molecular  
527 basis of host specificity. The evolutionary processes that gave rise to the obligate  
528 biotrophic lifestyles of *Pneumocystis* within its host remain important future research  
529 questions (43, 44). The next important steps will also include the study of the influence of  
530 host biology on *Pneumocystis* adaptation, the genetic mechanisms underlying pathogen  
531 host shifts, and the genetic incompatibility between coexisting pathogens (e.g. *P. carinii*  
532 and *P. wakefieldiae* in rats).

533

## 534 **Material and Methods**

### 535 **Experimental Design and *Pneumocystis* sample sources**

536 Animal and human subject experimentation guidelines of the National Institutes of  
537 Health (NIH) were followed in the conduct of this study. Studies of human and  
538 mouse *Pneumocystis* infection were approved by NIH Institutional Review Board (IRB)  
539 protocols 99-I-0084 and CCM 19-05, respectively. The collection and processing of a  
540 single *P. jirovecii* human bronchoalveolar lavage sample from China (Pj55) was  
541 approved by the IRB of the First Affiliated Hospital of Chongqing Medical University,

542 China (protocol no. 20172901). Written informed consent was obtained from the patient  
543 for the participation in this study. The authors confirmed that personal identity  
544 information of the patient data was unidentifiable from this report. The National Institute  
545 of Allergy and Infectious Diseases (NIAID) Division of Intramural Research Animal  
546 Care and Use Program, as part of the NIH Intramural Research Program, approved all  
547 experimental procedures pertaining to the macaques (protocol LVD 26). Nonhuman  
548 primate study protocols were approved by the Institutional Animal Care and Use  
549 Committee of the University of California, Davis (protocol no. 7092), the Tulane  
550 National Primate Research Center (TNPRC) and the Institutional Animal Care and Use  
551 Committee (IACUC) (protocol no. P0351R). Studies of  
552 rabbit *Pneumocystis* infection were reviewed and approved by the Institutional Animal  
553 Care and Use Committee of the University of Michigan (protocol no. RO00008218). For  
554 rabbit samples obtained France, the conditions for care of laboratory animals stipulated in  
555 European guidelines were followed (See: Council directives on the protection of animals  
556 for experimental and other scientific purposes, and J. Off. Communautés Européennes,  
557 86/609/EEC, 18 December 1986, L358). Samples from *Pneumocystis* infected dog were  
558 collected as diagnostic samples and approved for only for research purpose. The owner's  
559 consents for using samples and data were obtained on admission of the case and no  
560 further ethics permission was required because it was a routine diagnostic case and did  
561 not qualify as an animal experiment. Studies of rat *Pneumocystis* infection were approved  
562 by the Veteran Affairs animal protocol (VA ACORP #17-12-05-01). Clinical information  
563 and demographic data of the groups of individuals are presented in Supplementary Table  
564 1.

565 Three *P. jirovecii* samples were obtained as bronchoalveolar lavage from patients  
566 at the NIH Clinical Center in Bethesda, MD, USA and Chongqing Medical University in  
567 Chongqing, China.

568 Six *P. macacae* samples were obtained as frozen lung tissues or formalin fixed  
569 paraffin embedded (FFPE) tissue sections prepared from SIV-infected rhesus macaques  
570 at the NIH Animal Center, Bethesda, Maryland ( $n = 2$ ), the Tulane National Primate  
571 Research Center, Covington, Louisiana ( $n = 3$ ), and the UC Davis California National  
572 Primate Research Center, Davis, California, USA ( $n = 1$ ).

573 Four *P. oryctolagi* samples were obtained as frozen lung tissues from one rabbit  
574 with severe combined immunodeficiency at the University of Michigan, Ann Arbor,  
575 Michigan, USA, or as DNA from two corticosteroid treated rabbits and one rabbit with  
576 spontaneous *Pneumocystis* infection at the Institut Pasteur de Lille and the Institut  
577 National de la Recherche Agronomique de Tours Pathologie Aviaire et Parasitologie,  
578 Tours, France.

579 *P. canis* samples were obtained as DNA from one Cavalier King Charles Spaniel  
580 dog at the University of Helsinki, Finland and one Whippet mixed-breed at the University  
581 of Veterinary Medicine, Vienna, Austria.

582 *P. murina* organisms were obtained from heavily-infected CD40L-KO mice  
583 following a short-term *in vitro* culture. Genomic data obtained from *P. murina* isolates  
584 were combined with previously sequenced public data (Supplementary Table 2) and used  
585 for population genomics analysis (section “Speciation history of the *Pneumocystis* genus”  
586 and Supplementary Note 1).

587 One frozen cell pellet and 4 agarose gel blocks containing *P. wakefieldiae* and *P.*  
588 *carinii* were obtained from immunosuppressed rats (one gel block per rat) housed at the  
589 Cincinnati VA Medical Center, Veterinary Medicine Unit, Cincinnati, Ohio.

590

### 591 **Genome sequencing, assembly and annotation**

592 Genomic DNA in agarose gel blocks was extracted using the ZymoClean Gel DNA  
593 Recovery Kit (Zymo Research). Genomic DNA in FFPE sections was extracted using the  
594 AllPrep DNA/RNA FFPE Kit (Qiagen). Genomic DNA in frozen lung tissues from two  
595 *P. macacae*-infected macaques and one *P. oryctolagi*-infected rabbit was extracted using  
596 the *Pneumocystis* DNA enrichment protocol as described elsewhere (5, 13). Genomic  
597 DNA in bronchoalveolar lavage samples from *P. jirovecii*-infected patients was extracted  
598 using the MasterPure Yeast DNA purification kit (Epicentre Biotechnologies, Madison,  
599 WI, USA). Total RNAs for *P. macacae*, *P. wakefieldiae* and *P. murina* were isolated  
600 using RNeasy Mini kit (Qiagen).

601 For DNA samples with small quantity, including three *P. oryctolagi* samples  
602 (RABF, RAB1 and RAB2B) and one *P. jirovecii* sample (RU817), we performed whole  
603 genome amplification prior to Illumina sequencing. Five microliters of each DNA sample  
604 were amplified in a 50- $\mu$ l reaction using an Illustra GenomiPhi DNA V3 DNA  
605 amplification kit (GE Healthcare, United Kingdom).

606 Genomic DNA samples were quantified using Qubit dsDNA HS assay kit  
607 (Invitrogen) and NanoDrop (ThermoFisher). RNA samples integrity and quality were  
608 assessed using Bioanalyzer RNA 6000 picoassay (Agilent). The identities of  
609 *Pneumocystis* organisms were verified by PCR and Sanger sequencing of mtLSU before

610 high throughput sequencing. For most of the DNA samples, at least one microgram of  
611 each DNA or RNA (depleted of ribosomal RNA using Illumina Ribo-Zero rRNA  
612 Removal Kit) sample was sequenced commercially using the Illumina HiSeq2500  
613 platform with 150 or 250-base paired-end libraries (Novogene Inc, USA) or for one DNA  
614 sample of *P. jirovecii* from a Chinese patient using a single-read SE50 library using the  
615 MGISEq 2000 platform (MGI Tec, China). Raw reads statistics and NCBI SRA accession  
616 numbers are presented in Supplementary Material (Data access section) and  
617 Supplementary Table 2.

618         Adapters and low-quality reads were discarded using trimmomatic v0.36 (45)  
619 with the parameters “-phred33 LEADING:3 TRAILING:3 SLIDINGWINDOW:4:15  
620 MINLEN:36”. Host DNA and other contaminating sequences were removed by mapping  
621 against host genomes using Bowtie2 v2.4.1 (46). Filtered Illumina reads were assembled  
622 *de novo* using Spades v3.11.1 (47). Details for host DNA sequences removal,  
623 *Pneumocystis* reads recovery and *de novo* assembly protocols are presented in  
624 Supplementary Material. Completeness of assemblies was estimated using BUSCO v9  
625 (48), FGMP v1.0.1 (49) and CEGMA v2.5 (50).

626         Nanopore sequencing was performed on *P. macacae* DNA samples prepared from  
627 a single heavily infected macaque (P2C) with ~68% *Pneumocystis* DNA based on prior  
628 Illumina sequencing (Supplementary Table 2). High molecular weight genomic DNA  
629 fragments were isolated using the BluePippin (Sage Science) with the high-pass filtering  
630 protocol. A DNA library was prepared using the rapid Sequencing kit (SQK-RAD0004)  
631 from Oxford Nanopore Technologies (Oxford, UK) and loaded in the MinION  
632 sequencing device. Host reads were removed by mapping to the Rhesus macaque genome



633 (NCBI accession number GCF\_000772875.2\_Mmul\_8.0.1) using Minimap2 v2.10 (51).  
634 Unmapped reads were aligned to the draft version of *P. macacae* assembly built  
635 previously using Illumina data (Supplementary Methods) with ngmlr v0.2.7 (52). A total  
636 of 1,633,376 nanopore reads were obtained, of which ~5% were attributed to  
637 *Pneumocystis* (27-fold coverage), which is much less than the 68% based on Illumina  
638 data (Supplementary Table 2). This suggests that many *P. macacae* genomic DNA  
639 fragments were too short to pass the size selection filter. *Pneumocystis* nanopore reads  
640 were assembled using Canu v.1.8.0 (53), overlapped with the assembly using Racon  
641 v.1.3.3 (54) and polished with Pilon v1.22 (55) using the Illumina reads aligned with  
642 BWA MEM v0.7.17 (56).

643       Illumina RNA-Seq of the *P. macacae* sample P2C yielded 22 millions reads, of  
644 which ~92% were attributed to *Pneumocystis* (Supplementary Table 2). Filtered reads  
645 were mapped to the *P. macacae* assembly using hisat2 v2.2.0 (57), sorted with SAMtools  
646 v1.10 (58) and filtered with PICARD v2.1.1 (<http://broadinstitute.github.io/picard>). *De*  
647 *novo* transcriptome assembly of filtered reads was performed with Trinity (59).  
648 Quantification of transcript abundance was performed using Kallisto v0.46.1 (60). *P.*  
649 *wakefieldiae* (2A) and *P. murina* RNA-Seq data were processed similarly  
650 (Supplementary Table 2).

651       DNA transposons, retrotransposons and low complexity repeats were identified  
652 using RepeatMasker (61), RepBase (62) and TransposonPSI  
653 (<http://transposonpsi.sourceforge.net>). *Pneumocystis* telomere motif “TTAGGG” (16)  
654 was searched using “FindTelomere” (available at  
655 <https://github.com/JanaSperschneider/FindTelomeres>). The genomes of *P. carinii* strain

656 Ccin (14) and strain SE6 (12) were scaffolded with Satsuma (63) using the *P. carinii*  
657 strain B80 as reference genome (13). *P. macacae*, *P. oryctolagi*, *P. canis* Ck1, *P. canis* A,  
658 *P. wakefieldiae*, and *P. carinii* (strains Ccin and SE6) genome assemblies were annotated  
659 using Funannotate v1.5.3 (DOI 10.5281/zenodo.1134477). The homology evidence  
660 consists of fungal proteins from UniProt (64) and BUSCO v9 fungal proteins (48). For *P.*  
661 *macacae* and *P. wakefieldiae*, RNA-Seq mapping files (BAM) and *de novo* transcriptome  
662 assemblies were used as hints for AUGUSTUS (65). *Ab initio* predictions were  
663 performed using GeneMark-ES (66). All evidences were merged using EvidenceModeler  
664 (67). *Taphrina* genomes (*T. deformans*, *T. wiesneri*, *T. flavoruba* and *T. populina* (32,  
665 68)) and *P. canis* Ck2 were annotated using MAKER2 (69) because predicted gene  
666 models showed a better quality than those obtained from Funannotate. MAKER2  
667 integrates *ab initio* prediction from SNAP (70), AUGUSTUS built-in *Pneumocystis* gene  
668 models (71) and GeneMark-ES as well as BLAST- based homology evidences from a  
669 custom fungal proteins database. GPI prediction was performed using PredGPI (72), big-  
670 PI (73) and KohGPI (74). Signal peptide leader sequences and transmembrane helices  
671 were predicted using Signal-P version 5 (75) and TMPred (76), respectively. Protein  
672 domains were inferred using Pfam database version 3.1 (77) with PfamScan  
673 ([https://bio.tools/pfamscan\\_api](https://bio.tools/pfamscan_api)). Domain enrichment analysis was performed using  
674 dcGOR version 1.0.6 (78). PRIAM (79) release JAN2018 was used to predict ECs using  
675 the following options: minimum probability > 0.5, profile coverage > 70%, check  
676 catalytic – TRUE and e-value < 10<sup>-3</sup>. *Pneumocystis* mitochondrial genome assembly and  
677 annotations are described in Supplementary Material. Three dimensional (3D) protein

678 structure prediction of Msg proteins was performed using DESTINI (80) and visualized  
679 with PyMol ([www.pymol.org](http://www.pymol.org)).

680

### 681 **Comparative genomics**

682 All genomes were pairwise aligned to the *Pneumocystis jirovecii* strain RU7 genome  
683 NCBI accession GCF\_001477535.1 (13) using LAST version 921 (22) with the MAM4  
684 seeding scheme (81). One-to-one pairwise alignments were created using maf-swap  
685 utility of LAST package and merged into a single multi-species whole genome alignment  
686 using LAST's maf-join utility. Pairwise rearrangement distances in terms of minimum  
687 number of rearrangements were inferred using GRIMM (82) and Mauve (83).

688 Breakpoints of genomic rearrangements were refined with Cassis (84) and annotated  
689 using BEDtools (85) 'annotate' command. Average pairwise genome-wide nucleotide  
690 divergences were computed with Minimap2 (51). Synteny visualization was carried out  
691 using Synima (86). Msg protein similarity networks were based on global pairwise  
692 identity obtained from pairwise alignments of full length proteins using Needle (87) or  
693 BLASTp (88) identity scores for individual protein domains. The networks presented in  
694 Figures 4 and 5 were generated using the Fruchterman Reingold algorithm as  
695 implemented in Gephi 0.9.2 (89).

696 To investigate the evolution of introns in *Pneumocystis* species, we identified  
697 unambiguous one-to-one orthologous clusters using reciprocal best Blast hit (e-value of  
698  $10^{-10}$  as cut off) in seven *Pneumocystis* species as well as in three other Taphrinomycotina  
699 fungi : *S. pombe*, *T. deformans* and *N. irregularis*. Intron position coordinates were  
700 extracted from annotated genomes using Replicer (90) and projected onto protein

701 multiple alignments using custom scripts. Homologous splice sites in annotated protein  
702 sequence alignments were identified using MALIN (91). We required at least 11  
703 unambiguous splicing sites and 5 minimal non-gapped positions. A potential splice was  
704 considered unambiguous if the site has at least 5 nongaps positions in the aligned  
705 sequences in both the left and right sides. MALIN uses a rates-across sites markov model  
706 with branch specific gain and loss rates to infer evolution of introns. Gain and loss rates  
707 were optimized through numerical optimizations. Fungi have a strong tendency to intron  
708 loss with few exceptions (e.g. *Cryptococcus*) whereas gain of intron is relatively rare.  
709 Thus, we penalized intron gain and set the variation rate to 4/3 for loss and gain levels.  
710 Intron evolutionary history was inferred using a posterior probabilistic estimation with  
711 100 bootstrap support values.

712

### 713 **Phylogenomics**

714 Orthologous gene families were inferred using OrthoFinder v.2.3.11 (92). In addition to  
715 *Pneumocystis* and *Taphrina* species, the predicted proteins for the following species were  
716 downloaded from NCBI: *Neolecta irregularis* (accession no. GCA\_001929475.1), *S.*  
717 *pombe* (GCF\_000002945.1), *S. cryophilus* (GCF\_000004155.1), *S. octosporus*  
718 (GCF\_000150505.1), *S. japonicus* (GCF\_000149845.2), *Saitoella complicata*  
719 (GCF\_001661265.1), *Neurospora crassa* (GCF\_000182925.2), *Cryptococcus*  
720 *neoformans* (GCF\_000149245.1), *Rhizopus oryzae* (GCA\_000697725.1) and  
721 *Batrachochytrium dendrobatidis* (GCF\_000203795.1). Single-copy genes were extracted  
722 from OrthoFinder output ( $n = 106$ ) and concatenated into a protein alignment containing  
723 458,948 distinct alignment patterns (i.e. unique columns in the alignment) with a gap

724 proportion of 12.2%. Maximum likelihood tree analysis was performed using RAxML v  
725 8.2.5 (93) with 1,000 bootstraps as support values. The LG model (94) was selected as  
726 the best amino acid model based on the likelihood PROTGAMMAAUTO in RAxML.  
727 106 gene trees were estimated from each of the single copy genes. The Shimodaira-  
728 Hasegawa test (18) was performed on the tree topology for each of the gene trees and the  
729 concatenated alignment using IQ-Tree (95) with 1,000 RELL bootstrap replicates.

730 To infer the species phylogeny using mitochondrial genomes, protein coding  
731 genes were extracted, aligned using Clustal Omega (96), and concatenated. The resulting  
732 alignment was used to infer phylogeny using IQ-Tree v.1.6 (97) with TVM+F+I+G4 as  
733 the Best-fit substitution model and 1,000 ultrafast bootstraps and SH-aLRT test. A total  
734 of 33 mitogenomes from seven *Pneumocystis* species were used: *P. jirovecii* [ $n = 18$   
735 including 3 sequences from this study and four from previous studies (5, 12, 17)], *P.*  
736 *macacae* ( $n = 4$ ), four *P. oryctolagi* ( $n = 4$ ), *P. canis* [ $n = 4$ , (17, 98)], *P. carinii* [ $n = 2$ ,  
737 (17, 98)], *P. murina* [ $n = 1$ , (17)] and *P. wakefieldiae* ( $n = 1$ ).

738 Phylogenetic reconciliations of species tree and gene trees were performed using  
739 Notung (99). Ancestral reconstruction of gene family's history was performed using  
740 Count (100). Phylogenetic network for Msg protein families was inferred using SplitTree  
741 (101). The detection of putative mosaic genes was performed using TOPALi v2.5 (102).

742

### 743 **Phyldating**

744 Single-copy orthogroup nucleotide sequences were aligned using MACS v0.9b1 (103).  
745 Highly polymorphic *msg* sequences were excluded using BLASTn (88) with an e-value  
746 of  $10^{-5}$  as cutoff against 479 published *msg* sequences (13). We inferred the divergence

747 timing using two datasets: (1) 24 single-copy nuclear gene orthologs shared by all  
748 *Pneumocystis* and *S. pombe*; and (2) 568 nuclear genes found in all *Pneumocystis* species.  
749 BEAST inputs were prepared using BEAUTi v2.5.1 (104). Unlinked relaxed lognormal  
750 molecular clock models (105, 106) and calibrated birth-death tree priors (107) were used  
751 to estimate the divergence times and the credibility intervals. The substitution site model  
752 HKY was applied (108). Three secondary calibration priors were used: (i) *P. jirovecii*/*P.*  
753 *macacae* divergence with a median time of 65 mya as 95% highest posterior density  
754 (HPD) (5)), (ii) the emergence of the *Pneumocystis* genus at a minimum age of 100 mya  
755 (4), and (iii) the *Schizosaccharomyces* – *Pneumocystis* split at ~ 467 mya (109). For the  
756 dataset 2, the 568 gene alignments were concatenated in a super alignment with 568  
757 partitions, with each partition defined by one gene. Gene partitions were collapsed using  
758 PartitionFinder v2.1.1 (110) with the “greedy” search to find optimal partitioning scheme.  
759 The alignment was split in three partitions in BEAST. Three independent runs for each  
760 dataset were performed separately for 60 million generations using random seeds. Run  
761 convergence was assessed with Tracer v1.7.1 (minimum effective sampling size of 200  
762 with a burn-in of 10%). Trees were summarized using TreeAnnotator v.2.5.1  
763 (<http://beast.bio.ed.ac.uk/treeannotator>) and visualized using FigTree v.1.4.4  
764 (<http://tree.bio.ed.ac.uk/software/figtree>) to obtain the means and 95% HPD. Host  
765 divergences were obtained from the most recent mammal tree of life (6), available at  
766 <http://vertlife.org/data/mammals>. The dating of fungal gene families was performed  
767 similarly.

768

769 **Population genomics**

770 Sequence data sources and primary statistics are presented in Supplementary Table 2.  
771 Adapter sequences and low-quality headers of base sequences were removed using  
772 Trimmomatic (45). Interspecies reads alignment was performed using LAST (22) with  
773 the MAM4 seeding scheme (81). Alignments were processed by last-split utility to allow  
774 inter species re-arrangements, sorted using SAMtools v1.10 (58). Duplicates were  
775 removed using and PICARD v2.1.1. To compute the  $F_{ST}$  and nucleotide diversity  
776 (Watterson, pairwise, FuLi, fayH, L), we calculated the unfolded site frequency spectra  
777 for each population using the Analysis of Next Generation Sequencing Data (ANGSD)  
778 (23). Site frequency spectra was estimated per base site allele frequencies using ANGS  
779 (23, 111). Hierarchical clustering was performed using ngsCovar (112). All data were  
780 formatted to fit a sliding windows of 1-10 kb using BEDTools (113). For each window,  
781 an average value of the statistics was calculated using custom scripts.

782

### 783 **Gene flow inference**

784 To infer a phylogenetic network, we used 1,718 one-to-one orthologs from gene catalogs  
785 of seven *Pneumocystis* species using reciprocal best BLASTp hit with an e-value of  $10^{-10}$   
786 as cut off. Sequences from each orthologous group were aligned using Muscle (114).  
787 Alignments with evidence of intragenic recombination were filtered out using PhiPack  
788 (115) with a p-value of 0.05 as cut off. For each aligned group a maximum likelihood  
789 (ML) tree was inferred using RAxML-ng (116) with GTR+G model and 100 bootstrap  
790 replicates, and Bayesian tree was generated using BEAST2 (104). ML trees were filtered  
791 using the following criteria: 0.9 as the maximum proportion of missing data, 100 as the  
792 minimum number of parsimony-informative sites, 50 as the minimum bootstrap node-

793 support value and 0.05 as the minimum p-value for rejecting the null hypothesis of no  
794 recombination within the alignment. BEAST trees with an effective sampling size < 200  
795 were removed. Filtered trees were summarized using Treannotator  
796 (<https://www.beast2.org/treeannotator/>). Summary trees with an average posterior support  
797 inferior to 0.8 were discarded. Species network was inferred using PhyloNet option  
798 “InferNetwork\_MPL” (33) with prior reticulation events ranging from 1 to 4.  
799 Phylogenetic networks were visualized using Dendroscope 3 (117).  
800 The highest probability network inferred a hybridization between *P. carinii* and *P.*  
801 *wakefieldiae* leading to *P. murina* followed by a backcrossing between *P. murina* with *P.*  
802 *wakefieldiae* (log probability = -12759.4). Analysis of tree topology frequencies revealed  
803 that 64% of the trees were consistent with the topology of (*P. carinii*, (*P. murina*, *P.*  
804 *wakefieldiae*)), 28% with the topology of (*P. wakefieldiae*, (*P. carinii*, *P. murina*)) and  
805 8% with the topology of (*P. murina*, (*P. carinii*, *P. wakefieldiae*)).

806

### 807 **Detection of positive selection**

808 To search for genes that have been subjected to positive selection in *P. jirovecii* alone  
809 after the divergence from *P. macacae*, we used the branch-site test (39) as implemented  
810 in PAML (118) which detects sites that have undergone positive selection in a specific  
811 branch of the phylogenetic tree (foreground branch). A set of 2,466 orthologous groups  
812 between *P. jirovecii*, *P. macacae* and *P. oryctolagi* was used for the test.  $d_N/d_S$  ratio  
813 estimates per branch per gene were obtained using Codeml (PAML v4.4c) with a free  
814 ratio model of evolution. This process identified 244 genes with a significant signal of  
815 positive selection only in *P. jirovecii* ( $d_N/d_S > 1$ ).



816

## 817 **Statistical analysis, custom scripts and figures**

818 All custom bioinformatic analyses were conducted using Perl v5.26.0

819 (<http://www.perl.org/>) or Python v.3.6 (<http://www.python.org>) scripts. Pipelines were

820 written using Snakemake v5.11.2 (119). Custom scripts and pipelines are available

821 [https://github.com/ocisse/pneumocystis\\_evolution](https://github.com/ocisse/pneumocystis_evolution). Statistical analyses were conducted in

822 R version 3.3.2 (120). Phylogenetic trees with geological time scale were visualized

823 using strap version 1.4 (121). Sequence motifs were visualized using WebLogo (122).

824 Multi-panel figures were assembled in Inkscape (<https://inkscape.org>). Icon credit in

825 Figure 6: Anthony Caravaggi under the license [https://creativecommons.org/licenses/by-](https://creativecommons.org/licenses/by-nc-sa/3.0/)

826 [nc-sa/3.0/](https://creativecommons.org/licenses/by-nc-sa/3.0/) (mouse), Sam Fraser-Smith (vectorized by T. Michael Keeseey) (dog).

827 <https://creativecommons.org/licenses/by/3.0/>. Anthony Caravaggi

828 <https://creativecommons.org/licenses/by-nc-sa/3.0/> (rabbit).

829

## 830 **Supplementary Materials**

831 Supplementary Methods.

832 Data access.

833 Note S1. Population genomics analysis.

834 Note S2. Metabolic pathways.

835 Fig. S1. The maximum clade credibility tree of *Pneumocystis* species.

836 Fig. S2. Maximum likelihood phylogeny constructed using a concatenated dataset of 15

837 protein coding genes from 33 *Pneumocystis* mitochondrial genomes.

838 Fig. S3. Genome-wide scans for footprints of natural selection in *Pneumocystis*.

- 839 Fig. S4. Evidence of ancient gene flow in rodent *Pneumocystis* only.
- 840 Fig. S5. Evolution of arginine-glycine (RG) rich proteins in *P. macacae*.
- 841 Fig. S6. Heatmap showing gene family distribution in *Pneumocystis*.
- 842 Fig. S7. Expansion of kexin peptidase families in *Pneumocystis*.
- 843 Fig. S8. Evolutionary history of CFEM domains in *Pneumocystis*.
- 844 Fig. S9. Evolutionary history of introns in *Pneumocystis* and Taphrinomycotina fungi.
- 845 Fig. S10. RAxML phylogeny and phylogenetic networks of Msg genes.
- 846 Fig. S11. Phylodating of major surface glycoproteins in *Pneumocystis*.
- 847 Table S1. Clinical information and demographic data of individual samples.
- 848 Table S2. Statistics and a posteriori classification of reads used in this study.
- 849 Table S3. Statistics of different *Pneumocystis* genome assemblies.
- 850 Table S4. Genome rearrangements among different *Pneumocystis* species.
- 851 Table S5. Pairwise nucleotide divergence (%) among *Pneumocystis* genomes.
- 852 Table S6. Subtelomeres in *P. macacae*
- 853 Table S7. *P. jirovecii* genome-wide signatures of selection.

854

855 **Acknowledgments:**

856 **Funding:** This work has been funded in whole or in part with federal funds from the  
857 Intramural Research Program of the US National Institutes of Health (NIH) Clinical  
858 Center and the National Institute of Allergy and Infectious Diseases (NIAID). This study  
859 used the Office of Cyber Infrastructure and Computational Biology (OCICB) High  
860 Performance Computing (HPC) cluster at the National Institute of Allergy and Infectious  
861 Diseases (NIAID), Bethesda, MD. This study also utilized the high-performance

862 computational capabilities of the Biowulf Linux cluster at the National Institutes of  
863 Health, Bethesda, MD (<http://biowulf.nih.gov>). **Author contributions:** O.H.C, L.M and  
864 J.A.K conceived the project and designed all the experiments. L.M, O.H.C, C.W.L, J.B,  
865 J.X, J.S, R.B, B.P, K.V.R, R.K, A.S, M.C, V.H, J.C, L.P, M.T.C, G.K, Y.L, J.A.K  
866 performed the laboratory work to obtain samples for sequencing. O.H.C, L.M, J.P.D,  
867 P.P.K, J.L developed and implemented methods for sample processing, library  
868 preparation and sequencing. O.H.C, L.M, J.E.S, C.A.C, N.S.U analyzed the data. O.H.C,  
869 L.M and J.A.K drafted the manuscript, which was revised by all authors. J.E.S. and  
870 C.A.C. are CIFAR Fellows in the program Fungal Kingdom: Threats and Opportunities.  
871 **Competing interests:** The authors declare no competing financial interest. **Data and**  
872 **materials availability:** All data needed to evaluate the conclusions in the paper are  
873 present in the paper and/or the Supplementary Materials.

874

875

876 The content of this publication does not necessarily reflect the views or policies of the  
877 Department of Health and Human Services, nor does mention of trade names,  
878 commercial products, or organizations imply endorsement by the U.S. Government.

879

880

881

882

883

884

885

886 **Figures:**

887 **Fig. 1. Whole genome structure and synteny among *Pneumocystis* species.** Species

888 names and their genome assembly identifiers are shown on the left. Horizontal  
889 black lines on the right represent sequences of all scaffolds for each genome laid  
890 end-to-end, with their nucleotide positions indicated at the bottom. Dark thick  
891 squares represent short scaffolds. Syntenic regions between genomes are linked  
892 with vertical gray lines. Reference genome assemblies of *P. jirovecii*, *P. carinii*  
893 and *P. murina* are from a prior study (13).

894

895 **Fig. 2. Phylogeny and divergence times of *Pneumocystis* species.** a, Maximum

896 likelihood phylogeny constructed using 106 single-copy genes based on 1,000  
897 replicates from 24 annotated fungal genome assemblies including 9 from  
898 *Pneumocystis* (highlighted with green background). Only one assembly is shown  
899 for each species except there are three for *P. canis* (assemblies Ck1, Ck2 and A).  
900 Bootstrap support (%) is presented on the branches. The fungal major  
901 phylogenetic phyla and subphyla are represented by their initials: *As*  
902 (Ascomycota), *Ba* (Basidiomycota), *Pe* (Pezizomycotina), *Mu* (Mucoromycota)  
903 and *Ta* (Taphrinomycotina). b, Schematic representation of species phylogeny  
904 and association between *Pneumocystis* species and their respective mammalian  
905 hosts. The dashed arrows directed lines represent the specific parasite-host  
906 relationships. c, Divergence times of *Pneumocystis* species and mammals.  
907 Divergence time medians are represented as squares for hosts and as circles for  
908 *Pneumocystis*, and the horizontal lines represent the 95% confidence intervals

909 (CI), which are color-coded the same for each *Pneumocystis* and its host. Closed  
910 elements represent nodes that are significantly different in term of divergence  
911 times (non-overlapping confidence intervals) whereas open elements represent  
912 nodes with overlapping confidence intervals. Catarrhini, taxonomic category  
913 (parvorder) including Humans, great apes, gibbons and Old-World monkeys.  
914 Euarchontoglires, superorder of mammals including rodents, lagomorphs,  
915 treeshrews, colugos and primates. Glires, taxonomic clade consisting of rodents  
916 and lagomorphs. Laurasiatheria, taxonomic clade of placental mammals that  
917 includes shrews, whales, bats, and carnivorans. Mya, million years ago. K-Pg,  
918 Cretaceous-Paleogene. The dotted vertical line representing the K-Pg mass  
919 extinction event at 66 mya is included for context only.

920

921 **Fig. 3. Distribution of protein families among *Pneumocystis* species.** a, Heatmap of  
922 Pfam protein domains with significant differences (Wilcoxon signed-rank test,  $p <$   
923 0.05) are included if the domain appears at least once in the following  
924 comparisons: primate *Pneumocystis* (*P. jirovecii* and *P. macacae*) versus other  
925 *Pneumocystis*, clade P1 (*P. jirovecii*, *P. macacae*, *P. oryctolagi*, *P. canis* Ck1)  
926 versus clade P2 (*P. carinii*, *P. murina* and *P. wakefieldiae*), primate *Pneumocystis*  
927 versus clade P2. The number of proteins containing each domain is indicated  
928 within each cell for each species. The heat map is colored according to a score, as  
929 indicated by the key at the upper right corner. b, Heatmap of distribution of  
930 enzymes (represented by Enzyme Commission numbers), with their presence and  
931 absence indicated by black and grey colored cells, respectively.

932

933 **Fig. 4. Clustering of *Pneumocystis* major surface glycoproteins (Msg).** a, Graphical  
934 representation of similarity between 482 Msg proteins from 7 *Pneumocystis*  
935 species generated using the Fruchterman Reingold algorithm. A 3-D model of a  
936 representative Msg protein A1 family (NCBI accession number T551\_00910)  
937 generated using DESTINI is presented in the upper left insert. Individual protein  
938 sequences are shown as dots and color-coded by species as shown at the bottom.  
939 The edge between two dots indicates a global pairwise identity equal or greater  
940 than 45%. The letters represent Msg families (A to E) and subfamilies (A1 to A3).  
941 N and U letters represent potentially novel Msg sequences (relative to our prior  
942 study (41)) and unclassified sequences, respectively. For sake of clarity only the  
943 major clusters were annotated. b, Phylogenetic network of a subset of Msg family  
944 A1 ( $n = 97$ ) in primate *Pneumocystis* including *P. jirovecii* (red) and *P. macacae*  
945 (dark cyan) suggesting recombination events at the root of the network. Nodes  
946 with more than two parents represent reticulate events. Bar represent the number  
947 of amino acids substitution per site. c, Phylogenetic network of Msg family A1 ( $n$   
948 = 33) in *P. oryctolagi* (red violet) and *P. canis* (light blue). d, Phylogenetic  
949 network of Msg family A1 ( $n = 113$ ) in rodent *Pneumocystis* including *P. carinii*  
950 (green), *P. murina* (dark blue) and *P. wakefieldiae* (blue violet). The complete  
951 phylogenetic network is provided in Supplementary Data.

952

953 **Fig. 5. Evolution of Msg cysteine-rich protein domains in *Pneumocystis*.** a, Heatmap  
954 showing the distribution of Msg domains in each *Pneumocystis* species. The color

955 change from blue- orange-brown indicates an increase in the number of domains.  
956 b, Graphical representation of protein similarity between domains, which  
957 highlights that the domains were present in the most recent common ancestor and  
958 were maintained other than perhaps domains M1 and M3. Domains are clustered  
959 by a minimum BLASTp cutoff of 70% protein identity. c, Maximum likelihood  
960 tree of the M1 domain. In both panels b and c, domains are color-coded by  
961 species as shown at the bottom.

962

963 **Fig. 6. Overview of the genomic evolution of the *Pneumocystis* genus.** Gene families  
964 are represented by letters: A to E for the five families of major surface  
965 glycoproteins (Msg) with the A family being further subdivided into three  
966 subfamilies A1, A2, and A3; K and R for kexins and arginine-glycine rich  
967 proteins, respectively. Larger fonts indicate expansions as inferred by maximum  
968 likelihood phylogenetic trees and networks. Dashed lines represent ancient  
969 hybridization between *P. carinii* and *P. wakefieldiae*. Detailed analysis also  
970 reveals distinct phylogenetic clusters within subfamilies. Introns and CFEM  
971 (common in fungal extracellular membrane) domains are enriched in  
972 *Pneumocystis* genes which indicate that these elements were likely present in the  
973 most recent common ancestor of *Pneumocystis* species. Animal icons were  
974 obtained from <http://phylopic.org>.

975

976 **References**

- 977 1. I. Durand-Joly *et al.*, *Pneumocystis carinii* f. sp. hominis is not infectious for  
978 SCID mice. *J Clin Microbiol* **40**, 1862-1865 (2002).
- 979 2. F. Gigliotti, A. G. Harmsen, C. G. Haidaris, P. J. Haidaris, *Pneumocystis carinii* is  
980 not universally transmissible between mammalian species. *Infect Immun* **61**,  
981 2886-2890 (1993).
- 982 3. M. T. Cushion, S. P. Keely, J. R. Stringer, Molecular and phenotypic description  
983 of *Pneumocystis wakefieldiae* sp. nov., a new species in rats. *Mycologia* **96**, 429-  
984 438 (2004).
- 985 4. S. P. Keely, J. M. Fischer, J. R. Stringer, Evolution and speciation of  
986 *Pneumocystis*. *J Eukaryot Microbiol* **50 Suppl**, 624-626 (2003).
- 987 5. O. H. Cisse *et al.*, Comparative Population Genomics Analysis of the Mammalian  
988 Fungal Pathogen *Pneumocystis*. *MBio* **9**, e00381-00318 (2018).
- 989 6. N. S. Upham, J. A. Esselstyn, W. Jetz, Inferring the mammal tree: Species-level  
990 sets of phylogenies for questions in ecology, evolution, and conservation. *PLoS*  
991 *Biol* **17**, e3000494 (2019).
- 992 7. I. McDougall, F. H. Brown, J. G. Fleagle, Stratigraphic placement and age of  
993 modern humans from Kibish, Ethiopia. *Nature* **433**, 733-736 (2005).
- 994 8. Y. Suzuki, M. Tomozawa, Y. Koizumi, K. Tsuchiya, H. Suzuki, Estimating the  
995 molecular evolutionary rates of mitochondrial genes referring to Quaternary ice  
996 age events with inferred population expansions and dispersals in Japanese  
997 *Apodemus*. *BMC Evol Biol* **15**, 187 (2015).
- 998 9. J. Guillot *et al.*, Parallel phylogenies of *Pneumocystis* species and their  
999 mammalian hosts. *J Eukaryot Microbiol Suppl*, 113S-115S (2001).



- 1000 10. A. Latinne *et al.*, Genetic diversity and evolution of *Pneumocystis* fungi infecting  
1001 wild Southeast Asian murid rodents. *Parasitology* **145**, 885-900 (2018).
- 1002 11. J. Petruzela *et al.*, Evolutionary history of *Pneumocystis* fungi in their African  
1003 rodent hosts. *Infect Genet Evol* **75**, 103934 (2019).
- 1004 12. O. H. Cisse, M. Pagni, P. M. Hauser, De novo assembly of the *Pneumocystis*  
1005 *jirovecii* genome from a single bronchoalveolar lavage fluid specimen from a  
1006 patient. *MBio* **4**, e00428-00412 (2012).
- 1007 13. L. Ma *et al.*, Genome analysis of three *Pneumocystis* species reveals adaptation  
1008 mechanisms to life exclusively in mammalian hosts. *Nat Commun* **7**, 10740  
1009 (2016).
- 1010 14. B. E. Slaven *et al.*, Draft assembly and annotation of the *Pneumocystis carinii*  
1011 genome. *J Eukaryot Microbiol* **53 Suppl 1**, S89-91 (2006).
- 1012 15. B. Lundgren, R. Cotton, J. D. Lundgren, J. C. Edman, J. A. Kovacs, Identification  
1013 of *Pneumocystis carinii* chromosomes and mapping of five genes. *Infect Immun*  
1014 **58**, 1705-1710 (1990).
- 1015 16. A. P. Underwood, E. J. Louis, R. H. Borts, J. R. Stringer, A. E. Wakefield,  
1016 *Pneumocystis carinii* telomere repeats are composed of TTAGGG and the  
1017 subtelomeric sequence contains a gene encoding the major surface glycoprotein.  
1018 *Mol Microbiol* **19**, 273-281 (1996).
- 1019 17. L. Ma *et al.*, Sequencing and characterization of the complete mitochondrial  
1020 genomes of three *Pneumocystis* species provide new insights into divergence  
1021 between human and rodent *Pneumocystis*. *Faseb J* **27**, 1962-1972 (2013).

- 1022 18. H. Shimodaira, M. Hasegawa, Multiple comparisons of log-likelihoods with  
1023 applications to phylogenetic inference. *Mol Biol Evol* **16**, 1114-1116 (1999).
- 1024 19. C. M. Aliouat-Denis *et al.*, Pneumocystis species, co-evolution and pathogenic  
1025 power. *Infect Genet Evol* **8**, 708-726 (2008).
- 1026 20. Y. Kitazoe *et al.*, Robust time estimation reconciles views of the antiquity of  
1027 placental mammals. *PLoS One* **2**, e384 (2007).
- 1028 21. J. L. S. Xing-Xing Shen, Abigail L. LaBella, Dana A. Oplente, Xiaofan Zhou,  
1029 Jacek Kominek, Yuanning Li, Marizeth Groenewald, Chris Todd Hittinger,  
1030 Antonis Rokas, Genome-scale phylogeny and contrasting modes of genome  
1031 evolution in the fungal phylum Ascomycota. *bioRxiv* **05**, 088658 (2020).
- 1032 22. S. M. Kielbasa, R. Wan, K. Sato, P. Horton, M. C. Frith, Adaptive seeds tame  
1033 genomic sequence comparison. *Genome Res* **21**, 487-493 (2011).
- 1034 23. T. S. Korneliussen, A. Albrechtsen, R. Nielsen, ANGSD: Analysis of Next  
1035 Generation Sequencing Data. *BMC Bioinformatics* **15**, 356 (2014).
- 1036 24. A. E. McBride, A. K. Conboy, S. P. Brown, C. Ariyachet, K. L. Rutledge,  
1037 Specific sequences within arginine-glycine-rich domains affect mRNA-binding  
1038 protein function. *Nucleic Acids Res* **37**, 4322-4330 (2009).
- 1039 25. D. A. Russian *et al.*, Characterization of a multicopy family of genes encoding a  
1040 surface-expressed serine endoprotease in rat *Pneumocystis carinii*. *Proc Assoc Am*  
1041 *Physicians* **111**, 347-356 (1999).
- 1042 26. G. Bairwa, W. Hee Jung, J. W. Kronstad, Iron acquisition in fungal pathogens of  
1043 humans. *Metallomics* **9**, 215-227 (2017).

- 1044 27. T. Tanaka, Y. Tateno, T. Gojobori, Evolution of vitamin B6 (pyridoxine)  
1045 metabolism by gain and loss of genes. *Mol Biol Evol* **22**, 243-250 (2005).
- 1046 28. C. Gournas, M. Prevost, E. M. Krammer, B. Andre, Function and Regulation of  
1047 Fungal Amino Acid Transporters: Insights from Predicted Structure. *Adv Exp*  
1048 *Med Biol* **892**, 69-106 (2016).
- 1049 29. G. Y. Lipschik, H. Masur, J. A. Kovacs, Polyamine metabolism in *Pneumocystis*  
1050 *carinii*. *J Infect Dis* **163**, 1121-1127 (1991).
- 1051 30. I. Velasco, S. Tenreiro, I. L. Calderon, B. Andre, *Saccharomyces cerevisiae* Aqr1  
1052 is an internal-membrane transporter involved in excretion of amino acids.  
1053 *Eukaryot Cell* **3**, 1492-1503 (2004).
- 1054 31. J. E. Stajich, F. S. Dietrich, S. W. Roy, Comparative genomic analysis of fungal  
1055 genomes reveals intron-rich ancestors. *Genome Biol* **8**, R223 (2007).
- 1056 32. O. H. Cisse *et al.*, Genome sequencing of the plant pathogen *Taphrina deformans*,  
1057 the causal agent of peach leaf curl. *MBio* **4**, e00055-00013 (2013).
- 1058 33. Y. Yu, L. Nakhleh, A maximum pseudo-likelihood approach for phylogenetic  
1059 networks. *BMC Genomics* **16 Suppl 10**, S10 (2015).
- 1060 34. E. Mazars *et al.*, Isoenzyme diversity in *Pneumocystis carinii* from rats, mice, and  
1061 rabbits. *J Infect Dis* **175**, 655-660 (1997).
- 1062 35. T. Aghova *et al.*, Fossils know it best: Using a new set of fossil calibrations to  
1063 improve the temporal phylogenetic framework of murid rodents (Rodentia:  
1064 Muridae). *Mol Phylogenet Evol* **128**, 98-111 (2018).
- 1065 36. S. B. Araujo *et al.*, Understanding Host-Switching by Ecological Fitting. *PLoS*  
1066 *One* **10**, e0139225 (2015).

- 1067 37. S. Restrepo, J. F. Tabima, M. F. Mideros, N. J. Grunwald, D. R. Matute,  
1068 Speciation in fungal and oomycete plant pathogens. *Annu Rev Phytopathol* **52**,  
1069 289-316 (2014).
- 1070 38. C. R. Icenhour, J. Arnold, M. Medvedovic, M. T. Cushion, Competitive  
1071 coexistence of two *Pneumocystis* species. *Infect Genet Evol* **6**, 177-186 (2006).
- 1072 39. J. Zhang, R. Nielsen, Z. Yang, Evaluation of an improved branch-site likelihood  
1073 method for detecting positive selection at the molecular level. *Mol Biol Evol* **22**,  
1074 2472-2479 (2005).
- 1075 40. E. Schmid-Siegert *et al.*, Mechanisms of Surface Antigenic Variation in the  
1076 Human Pathogenic Fungus *Pneumocystis jirovecii*. *MBio* **8**, e01470-01417  
1077 (2017).
- 1078 41. L. Ma *et al.*, Diversity and Complexity of the Large Surface Protein Family in the  
1079 Compacted Genomes of Multiple *Pneumocystis* Species. *mBio* **11**, (2020).
- 1080 42. K. B. R. Morand S., Poulin R., *Micromammals and Macroparasites*. (2006).
- 1081 43. M. T. Cushion *et al.*, Transcriptome of *Pneumocystis carinii* during fulminate  
1082 infection: carbohydrate metabolism and the concept of a compatible parasite.  
1083 *PLoS One* **2**, e423 (2007).
- 1084 44. O. H. Cisse, M. Pagni, P. M. Hauser, Comparative Genomics Suggests That the  
1085 Human Pathogenic Fungus *Pneumocystis jirovecii* Acquired Obligate Biotrophy  
1086 through Gene Loss. *Genome Biology and Evolution* **6**, 1938-1948 (2014).
- 1087 45. A. M. Bolger, M. Lohse, B. Usadel, Trimmomatic: a flexible trimmer for Illumina  
1088 sequence data. *Bioinformatics* **30**, 2114-2120 (2014).

- 1089 46. B. Langmead, S. L. Salzberg, Fast gapped-read alignment with Bowtie 2. *Nat*  
1090 *Methods* **9**, 357-359 (2012).
- 1091 47. A. Bankevich *et al.*, SPAdes: a new genome assembly algorithm and its  
1092 applications to single-cell sequencing. *J Comput Biol* **19**, 455-477 (2012).
- 1093 48. F. A. Simao, R. M. Waterhouse, P. Ioannidis, E. V. Kriventseva, E. M. Zdobnov,  
1094 BUSCO: assessing genome assembly and annotation completeness with single-  
1095 copy orthologs. *Bioinformatics* **31**, 3210-3212 (2015).
- 1096 49. O. H. Cisse, J. E. Stajich, FGMP: assessing fungal genome completeness. *BMC*  
1097 *Bioinformatics* **20**, 184 (2019).
- 1098 50. G. Parra, K. Bradnam, I. Korf, CEGMA: a pipeline to accurately annotate core  
1099 genes in eukaryotic genomes. *Bioinformatics* **23**, 1061-1067 (2007).
- 1100 51. H. Li, Minimap2: pairwise alignment for nucleotide sequences. *Bioinformatics*  
1101 **34**, 3094-3100 (2018).
- 1102 52. F. J. Sedlazeck *et al.*, Accurate detection of complex structural variations using  
1103 single-molecule sequencing. *Nat Methods* **15**, 461-468 (2018).
- 1104 53. S. Koren *et al.*, Canu: scalable and accurate long-read assembly via adaptive k-  
1105 mer weighting and repeat separation. *Genome Res* **27**, 722-736 (2017).
- 1106 54. R. Vaser, I. Sovic, N. Nagarajan, M. Sikic, Fast and accurate de novo genome  
1107 assembly from long uncorrected reads. *Genome Res* **27**, 737-746 (2017).
- 1108 55. B. J. Walker *et al.*, Pilon: an integrated tool for comprehensive microbial variant  
1109 detection and genome assembly improvement. *PLoS One* **9**, e112963 (2014).
- 1110 56. H. Li, Aligning sequence reads, clone sequences and assembly contigs with  
1111 BWA-MEM. *arXiv*, 1303.3997 (2013).

- 1112 57. M. Pertea, D. Kim, G. M. Pertea, J. T. Leek, S. L. Salzberg, Transcript-level  
1113 expression analysis of RNA-Seq experiments with HISAT, StringTie and  
1114 Ballgown. *Nat Protoc* **11**, 1650-1667 (2016).
- 1115 58. H. Li *et al.*, The Sequence Alignment/Map format and SAMtools. *Bioinformatics*  
1116 **25**, 2078-2079 (2009).
- 1117 59. M. G. Grabherr *et al.*, Full-length transcriptome assembly from RNA-Seq data  
1118 without a reference genome. *Nat Biotechnol* **29**, 644-652 (2011).
- 1119 60. N. L. Bray, H. Pimentel, P. Melsted, L. Pachter, Near-optimal probabilistic RNA-  
1120 Seq quantification. *Nat Biotechnol* **34**, 525-527 (2016).
- 1121 61. S. AFA, RepeatMasker. (1996-2005).
- 1122 62. W. Bao, K. K. Kojima, O. Kohany, Repbase Update, a database of repetitive  
1123 elements in eukaryotic genomes. *Mob DNA* **6**, 11 (2015).
- 1124 63. M. G. Grabherr *et al.*, Genome-wide synteny through highly sensitive sequence  
1125 alignment: Satsuma. *Bioinformatics* **26**, 1145-1151 (2010).
- 1126 64. T. UniProt Consortium, UniProt: the universal protein knowledgebase. *Nucleic*  
1127 *Acids Res* **46**, 2699 (2018).
- 1128 65. M. Stanke, S. Waack, Gene prediction with a hidden Markov model and a new  
1129 intron submodel. *Bioinformatics* **19 Suppl 2**, ii215-225 (2003).
- 1130 66. V. Ter-Hovhannisyan, A. Lomsadze, Y. O. Chernoff, M. Borodovsky, Gene  
1131 prediction in novel fungal genomes using an ab initio algorithm with  
1132 unsupervised training. *Genome Res* **18**, 1979-1990 (2008).

- 1133 67. B. J. Haas *et al.*, Automated eukaryotic gene structure annotation using  
1134 EVIDENCEModeler and the Program to Assemble Spliced Alignments. *Genome*  
1135 *Biol* **9**, R7 (2008).
- 1136 68. I. J. Tsai *et al.*, Comparative genomics of Taphrina fungi causing varying degrees  
1137 of tumorous deformity in plants. *Genome Biol Evol* **6**, 861-872 (2014).
- 1138 69. C. Holt, M. Yandell, MAKER2: an annotation pipeline and genome-database  
1139 management tool for second-generation genome projects. *BMC Bioinformatics*  
1140 **12**, 491 (2011).
- 1141 70. I. Korf, Gene finding in novel genomes. *BMC Bioinformatics* **5**, 59 (2004).
- 1142 71. P. M. Hauser *et al.*, Comparative Genomics Suggests that the Fungal Pathogen  
1143 Pneumocystis Is an Obligate Parasite Scavenging Amino Acids from Its Host's  
1144 Lungs. *Plos One* **5**, (2010).
- 1145 72. A. Pierleoni, P. L. Martelli, R. Casadio, PredGPI: a GPI-anchor predictor. *BMC*  
1146 *Bioinformatics* **9**, 392 (2008).
- 1147 73. B. Eisenhaber, G. Schneider, M. Wildpaner, F. Eisenhaber, A sensitive predictor  
1148 for potential GPI lipid modification sites in fungal protein sequences and its  
1149 application to genome-wide studies for *Aspergillus nidulans*, *Candida albicans*,  
1150 *Neurospora crassa*, *Saccharomyces cerevisiae* and *Schizosaccharomyces pombe*. *J*  
1151 *Mol Biol* **337**, 243-253 (2004).
- 1152 74. N. Fankhauser, P. Maser, Identification of GPI anchor attachment signals by a  
1153 Kohonen self-organizing map. *Bioinformatics* **21**, 1846-1852 (2005).
- 1154 75. J. J. Almagro Armenteros *et al.*, SignalP 5.0 improves signal peptide predictions  
1155 using deep neural networks. *Nat Biotechnol* **37**, 420-423 (2019).

- 1156 76. K. H. a. W. Stoffel, TMbase - A database of membrane spanning proteins  
1157 segments. *Biol. Chem. Hoppe-Seyler* **374**, 166 (1993).
- 1158 77. S. El-Gebali *et al.*, The Pfam protein families database in 2019. *Nucleic Acids Res*  
1159 **47**, D427-D432 (2019).
- 1160 78. H. Fang, dcGOR: an R package for analysing ontologies and protein domain  
1161 annotations. *PLoS Comput Biol* **10**, e1003929 (2014).
- 1162 79. C. Claudel-Renard, C. Chevalet, T. Faraut, D. Kahn, Enzyme-specific profiles for  
1163 genome annotation: PRIAM. *Nucleic Acids Res* **31**, 6633-6639 (2003).
- 1164 80. M. Gao, H. Zhou, J. Skolnick, DESTINI: A deep-learning approach to contact-  
1165 driven protein structure prediction. *Sci Rep* **9**, 3514 (2019).
- 1166 81. M. C. Frith, L. Noe, Improved search heuristics find 20,000 new alignments  
1167 between human and mouse genomes. *Nucleic Acids Res* **42**, e59 (2014).
- 1168 82. G. Tesler, GRIMM: genome rearrangements web server. *Bioinformatics* **18**, 492-  
1169 493 (2002).
- 1170 83. A. E. Darling, B. Mau, N. T. Perna, progressiveMauve: multiple genome  
1171 alignment with gene gain, loss and rearrangement. *PLoS One* **5**, e11147 (2010).
- 1172 84. C. Baudet *et al.*, Cassis: detection of genomic rearrangement breakpoints.  
1173 *Bioinformatics* **26**, 1897-1898 (2010).
- 1174 85. A. R. Quinlan, BEDTools: The Swiss-Army Tool for Genome Feature Analysis.  
1175 *Curr Protoc Bioinformatics* **47**, 11 12 11-34 (2014).
- 1176 86. R. A. Farrer, Synima: a Synteny imaging tool for annotated genome assemblies.  
1177 *BMC Bioinformatics* **18**, 507 (2017).



- 1178 87. P. Rice, I. Longden, A. Bleasby, EMBOSS: the European Molecular Biology  
1179 Open Software Suite. *Trends Genet* **16**, 276-277 (2000).
- 1180 88. S. F. Altschul *et al.*, Gapped BLAST and PSI-BLAST: a new generation of  
1181 protein database search programs. *Nucleic Acids Res* **25**, 3389-3402 (1997).
- 1182 89. H. S. Bastian M., Jacomy M, paper presented at the International AAAI  
1183 Conference on Weblogs and Social Media, 2009.
- 1184 90. S. Seton Bocco, M. Csuros, Splice Sites Seldom Slide: Intron Evolution in  
1185 Oomycetes. *Genome Biol Evol* **8**, 2340-2350 (2016).
- 1186 91. M. Csuros, Malin: maximum likelihood analysis of intron evolution in  
1187 eukaryotes. *Bioinformatics* **24**, 1538-1539 (2008).
- 1188 92. D. M. Emms, S. Kelly, OrthoFinder: solving fundamental biases in whole genome  
1189 comparisons dramatically improves orthogroup inference accuracy. *Genome Biol*  
1190 **16**, 157 (2015).
- 1191 93. A. Stamatakis, RAxML version 8: a tool for phylogenetic analysis and post-  
1192 analysis of large phylogenies. *Bioinformatics* **30**, 1312-1313 (2014).
- 1193 94. S. Q. Le, O. Gascuel, An improved general amino acid replacement matrix. *Mol*  
1194 *Biol Evol* **25**, 1307-1320 (2008).
- 1195 95. B. Q. Minh *et al.*, IQ-TREE 2: New Models and Efficient Methods for  
1196 Phylogenetic Inference in the Genomic Era. *Mol Biol Evol* **37**, 1530-1534 (2020).
- 1197 96. F. Sievers, D. G. Higgins, Clustal Omega, accurate alignment of very large  
1198 numbers of sequences. *Methods Mol Biol* **1079**, 105-116 (2014).

- 1199 97. L. T. Nguyen, H. A. Schmidt, A. von Haeseler, B. Q. Minh, IQ-TREE: a fast and  
1200 effective stochastic algorithm for estimating maximum-likelihood phylogenies.  
1201 *Mol Biol Evol* **32**, 268-274 (2015).
- 1202 98. T. M. Sesterhenn *et al.*, Sequence and structure of the linear mitochondrial  
1203 genome of *Pneumocystis carinii*. *Mol Genet Genomics* **283**, 63-72 (2010).
- 1204 99. M. Stolzer *et al.*, Inferring duplications, losses, transfers and incomplete lineage  
1205 sorting with nonbinary species trees. *Bioinformatics* **28**, i409-i415 (2012).
- 1206 100. M. Csuros, Count: evolutionary analysis of phylogenetic profiles with parsimony  
1207 and likelihood. *Bioinformatics* **26**, 1910-1912 (2010).
- 1208 101. D. H. Huson, D. Bryant, Application of phylogenetic networks in evolutionary  
1209 studies. *Mol Biol Evol* **23**, 254-267 (2006).
- 1210 102. G. McGuire, F. Wright, TOPAL 2.0: improved detection of mosaic sequences  
1211 within multiple alignments. *Bioinformatics* **16**, 130-134 (2000).
- 1212 103. V. Ranwez, E. J. P. Douzery, C. Cambon, N. Chantret, F. Delsuc, MACSE v2:  
1213 Toolkit for the Alignment of Coding Sequences Accounting for Frameshifts and  
1214 Stop Codons. *Mol Biol Evol* **35**, 2582-2584 (2018).
- 1215 104. R. Bouckaert *et al.*, BEAST 2: a software platform for Bayesian evolutionary  
1216 analysis. *PLoS Comput Biol* **10**, e1003537 (2014).
- 1217 105. A. J. Drummond, S. Y. Ho, M. J. Phillips, A. Rambaut, Relaxed phylogenetics  
1218 and dating with confidence. *PLoS Biol* **4**, e88 (2006).
- 1219 106. T. Gernhard, The conditioned reconstructed process. *J Theor Biol* **253**, 769-778  
1220 (2008).

- 1221 107. J. Heled, A. J. Drummond, Calibrated birth-death phylogenetic time-tree priors  
1222 for bayesian inference. *Syst Biol* **64**, 369-383 (2015).
- 1223 108. M. Hasegawa, H. Kishino, T. Yano, Dating of the human-ape splitting by a  
1224 molecular clock of mitochondrial DNA. *J Mol Evol* **22**, 160-174 (1985).
- 1225 109. C. Beimforde *et al.*, Estimating the Phanerozoic history of the Ascomycota  
1226 lineages: combining fossil and molecular data. *Mol Phylogenet Evol* **78**, 386-398  
1227 (2014).
- 1228 110. R. Lanfear, P. B. Frandsen, A. M. Wright, T. Senfeld, B. Calcott, PartitionFinder  
1229 2: New Methods for Selecting Partitioned Models of Evolution for Molecular and  
1230 Morphological Phylogenetic Analyses. *Mol Biol Evol* **34**, 772-773 (2017).
- 1231 111. T. S. Korneliussen, I. Moltke, A. Albrechtsen, R. Nielsen, Calculation of Tajima's  
1232 D and other neutrality test statistics from low depth next-generation sequencing  
1233 data. *BMC Bioinformatics* **14**, 289 (2013).
- 1234 112. M. Fumagalli *et al.*, Quantifying population genetic differentiation from next-  
1235 generation sequencing data. *Genetics* **195**, 979-992 (2013).
- 1236 113. A. R. Quinlan, I. M. Hall, BEDTools: a flexible suite of utilities for comparing  
1237 genomic features. *Bioinformatics* **26**, 841-842 (2010).
- 1238 114. R. C. Edgar, MUSCLE: multiple sequence alignment with high accuracy and high  
1239 throughput. *Nucleic Acids Res* **32**, 1792-1797 (2004).
- 1240 115. T. C. Bruen, H. Philippe, D. Bryant, A simple and robust statistical test for  
1241 detecting the presence of recombination. *Genetics* **172**, 2665-2681 (2006).

- 1242 116. A. M. Kozlov, D. Darriba, T. Flouri, B. Morel, A. Stamatakis, RAxML-NG: A  
1243 fast, scalable, and user-friendly tool for maximum likelihood phylogenetic  
1244 inference. *Bioinformatics*, (2019).
- 1245 117. D. H. Huson, C. Scornavacca, Dendroscope 3: an interactive tool for rooted  
1246 phylogenetic trees and networks. *Syst Biol* **61**, 1061-1067 (2012).
- 1247 118. Z. Yang, PAML 4: phylogenetic analysis by maximum likelihood. *Mol Biol Evol*  
1248 **24**, 1586-1591 (2007).
- 1249 119. J. Koster, S. Rahmann, Snakemake--a scalable bioinformatics workflow engine.  
1250 *Bioinformatics* **28**, 2520-2522 (2012).
- 1251 120. R. C. Team, in *R Foundation for Statistical Computing*. (Vienna, Austria, 2018).
- 1252 121. L. G. Bell MA, strap: an R package for plotting phylogenies against stratigraphy  
1253 and assessing their stratigraphic congruence. *Palaeontology* **58**, 379–389 (2015).
- 1254 122. G. E. Crooks, G. Hon, J. M. Chandonia, S. E. Brenner, WebLogo: a sequence  
1255 logo generator. *Genome Res* **14**, 1188-1190 (2004).
- 1256

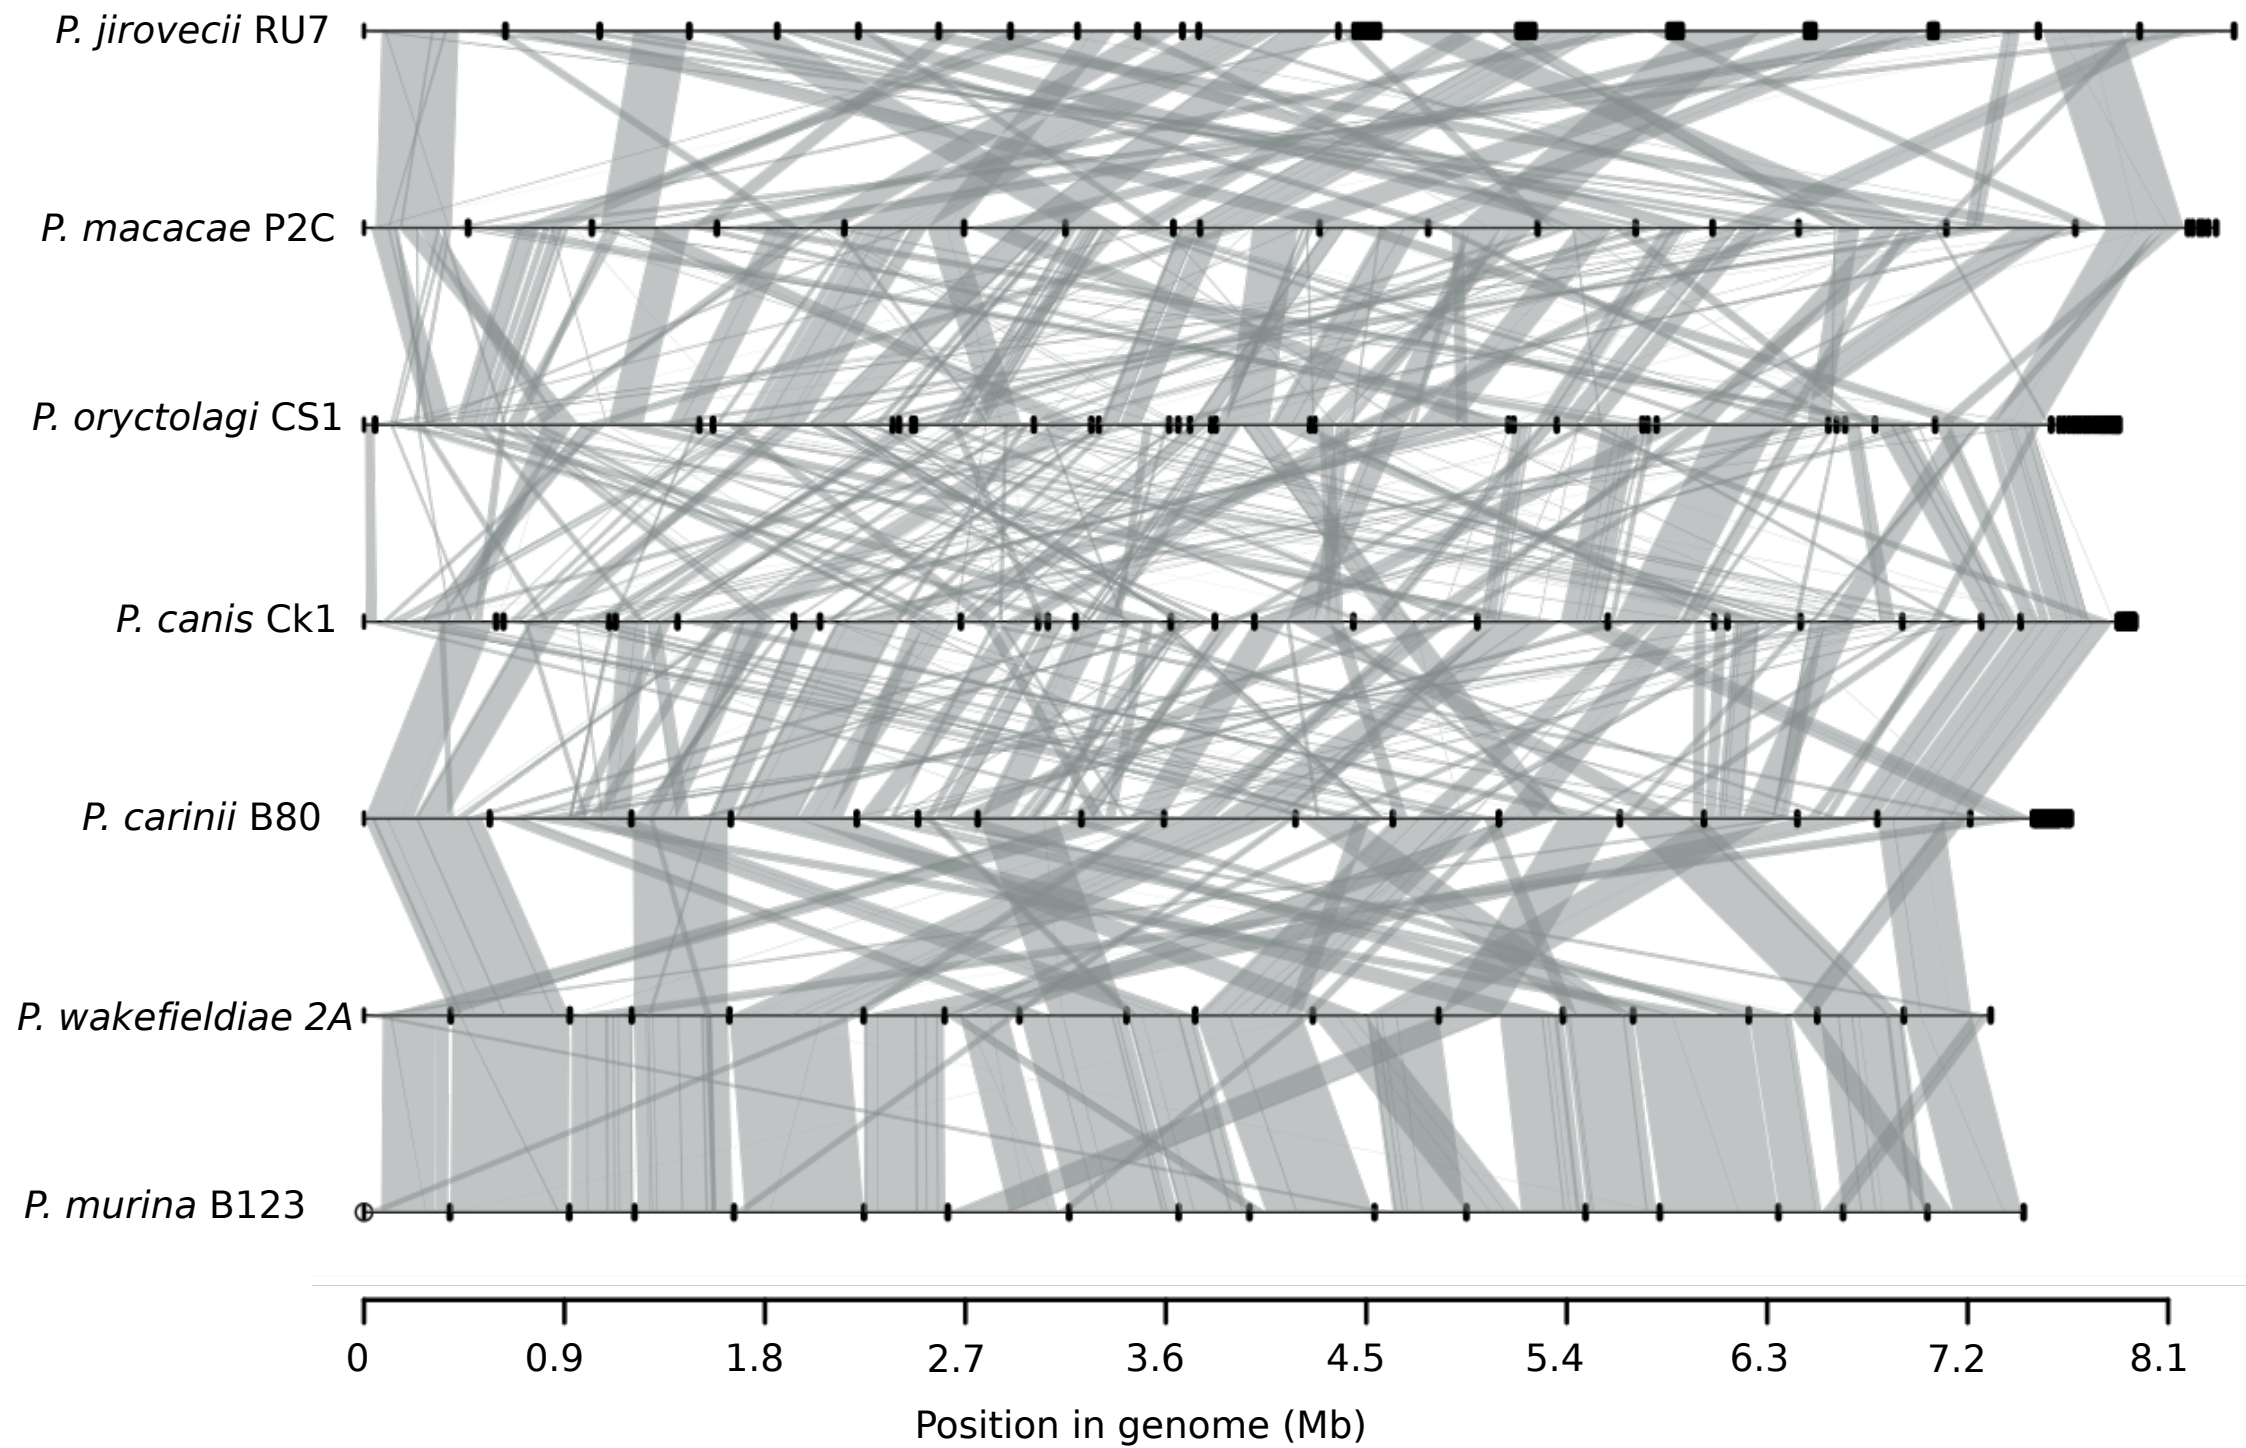

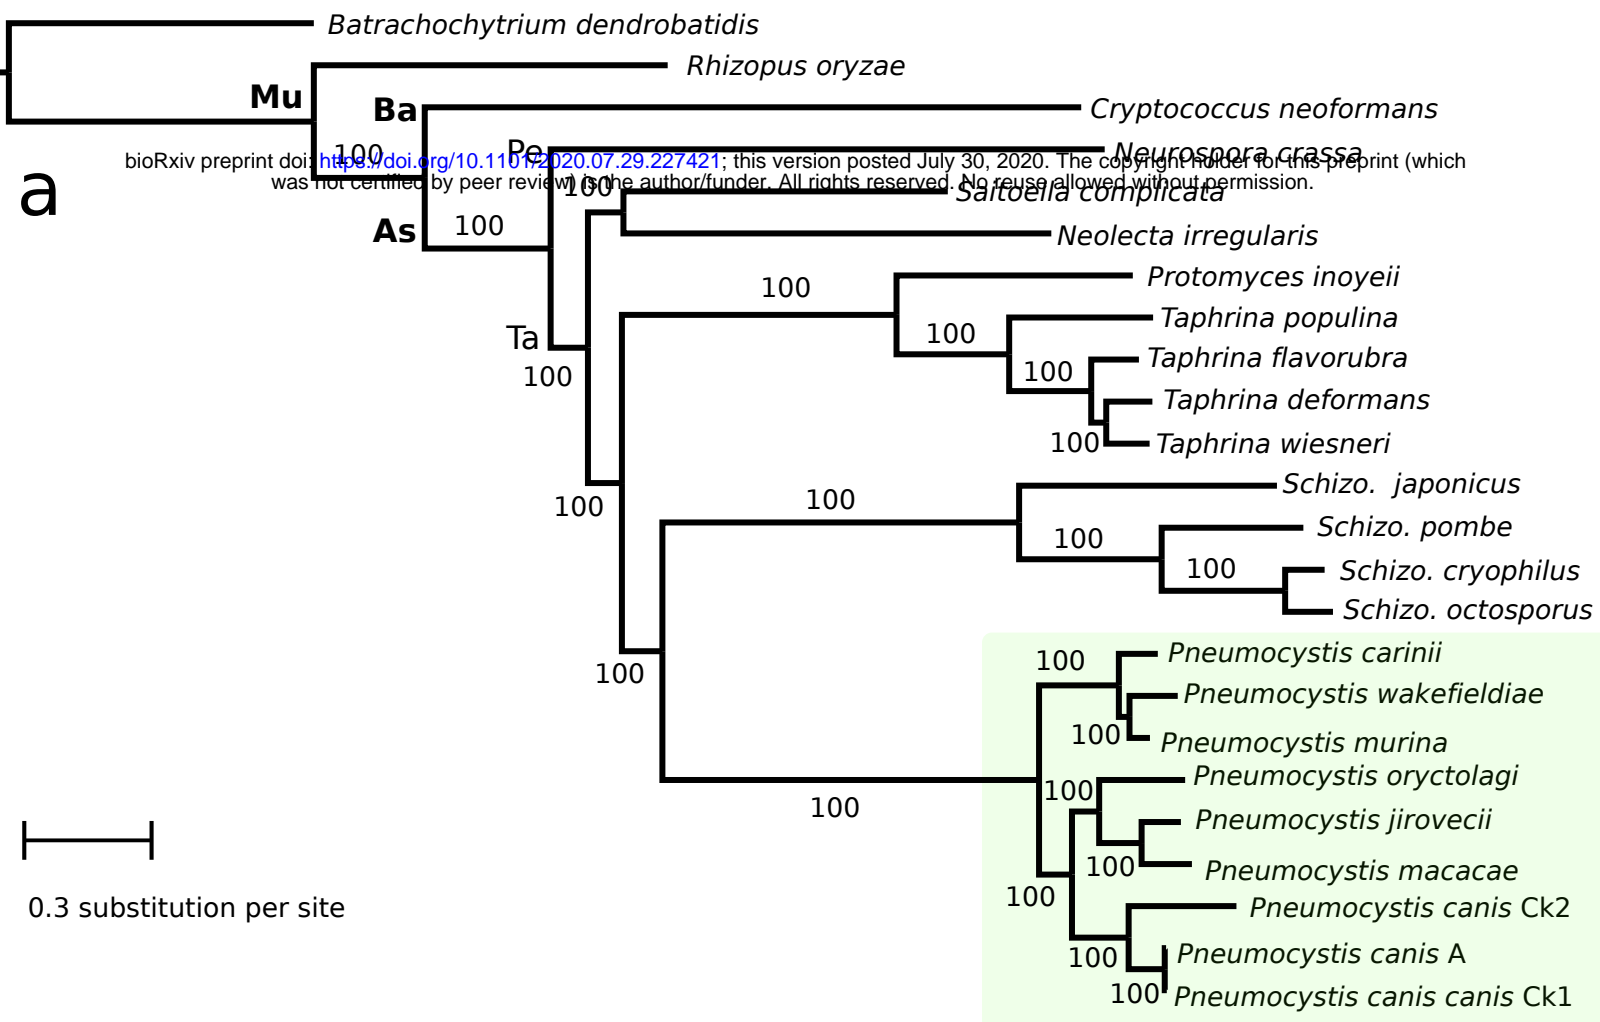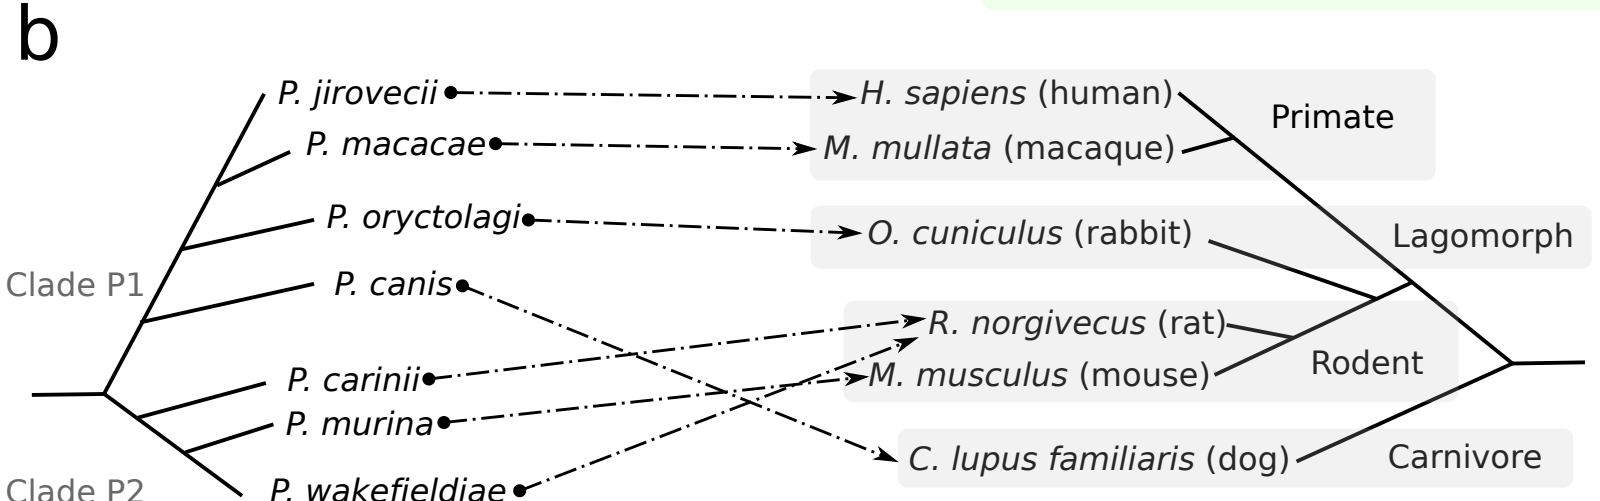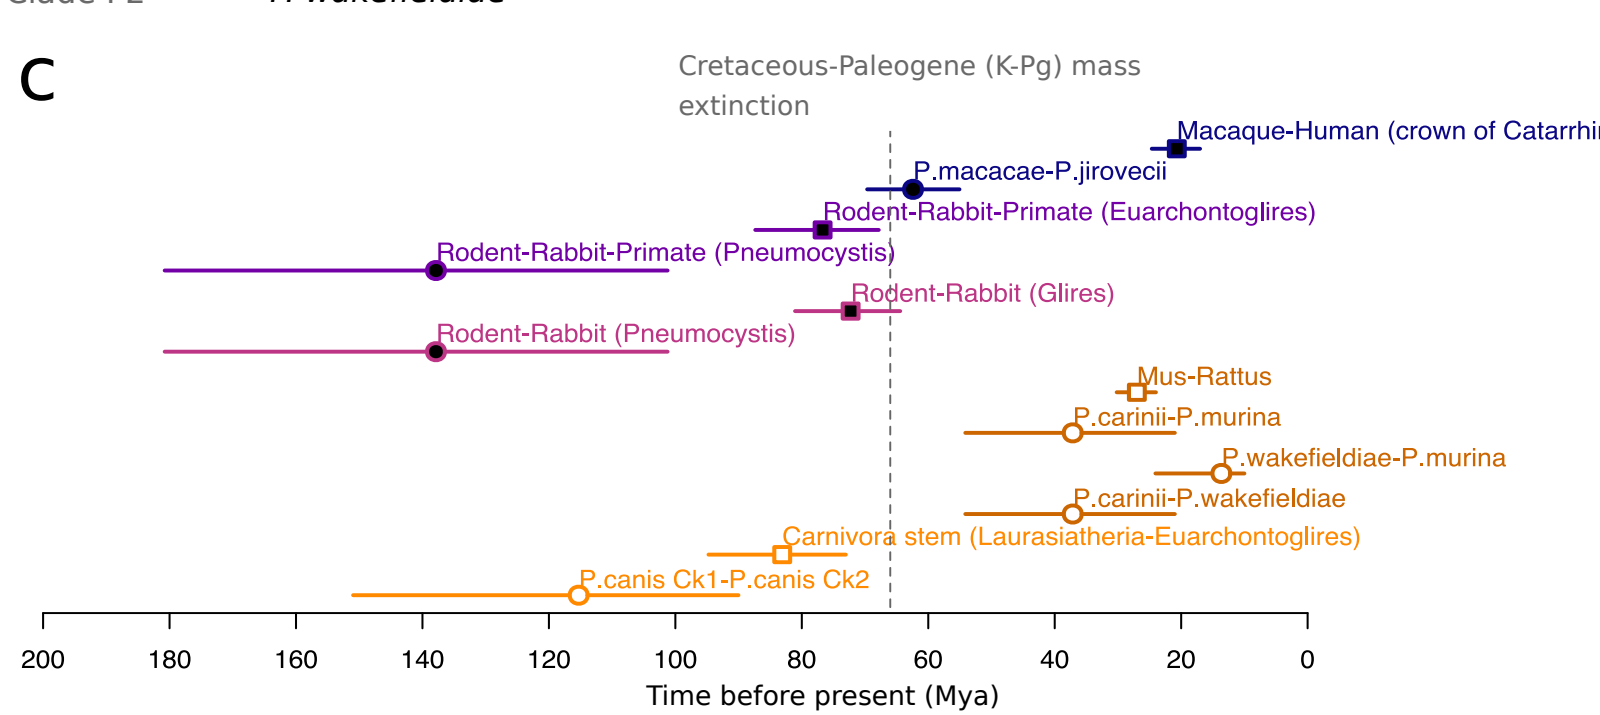



a

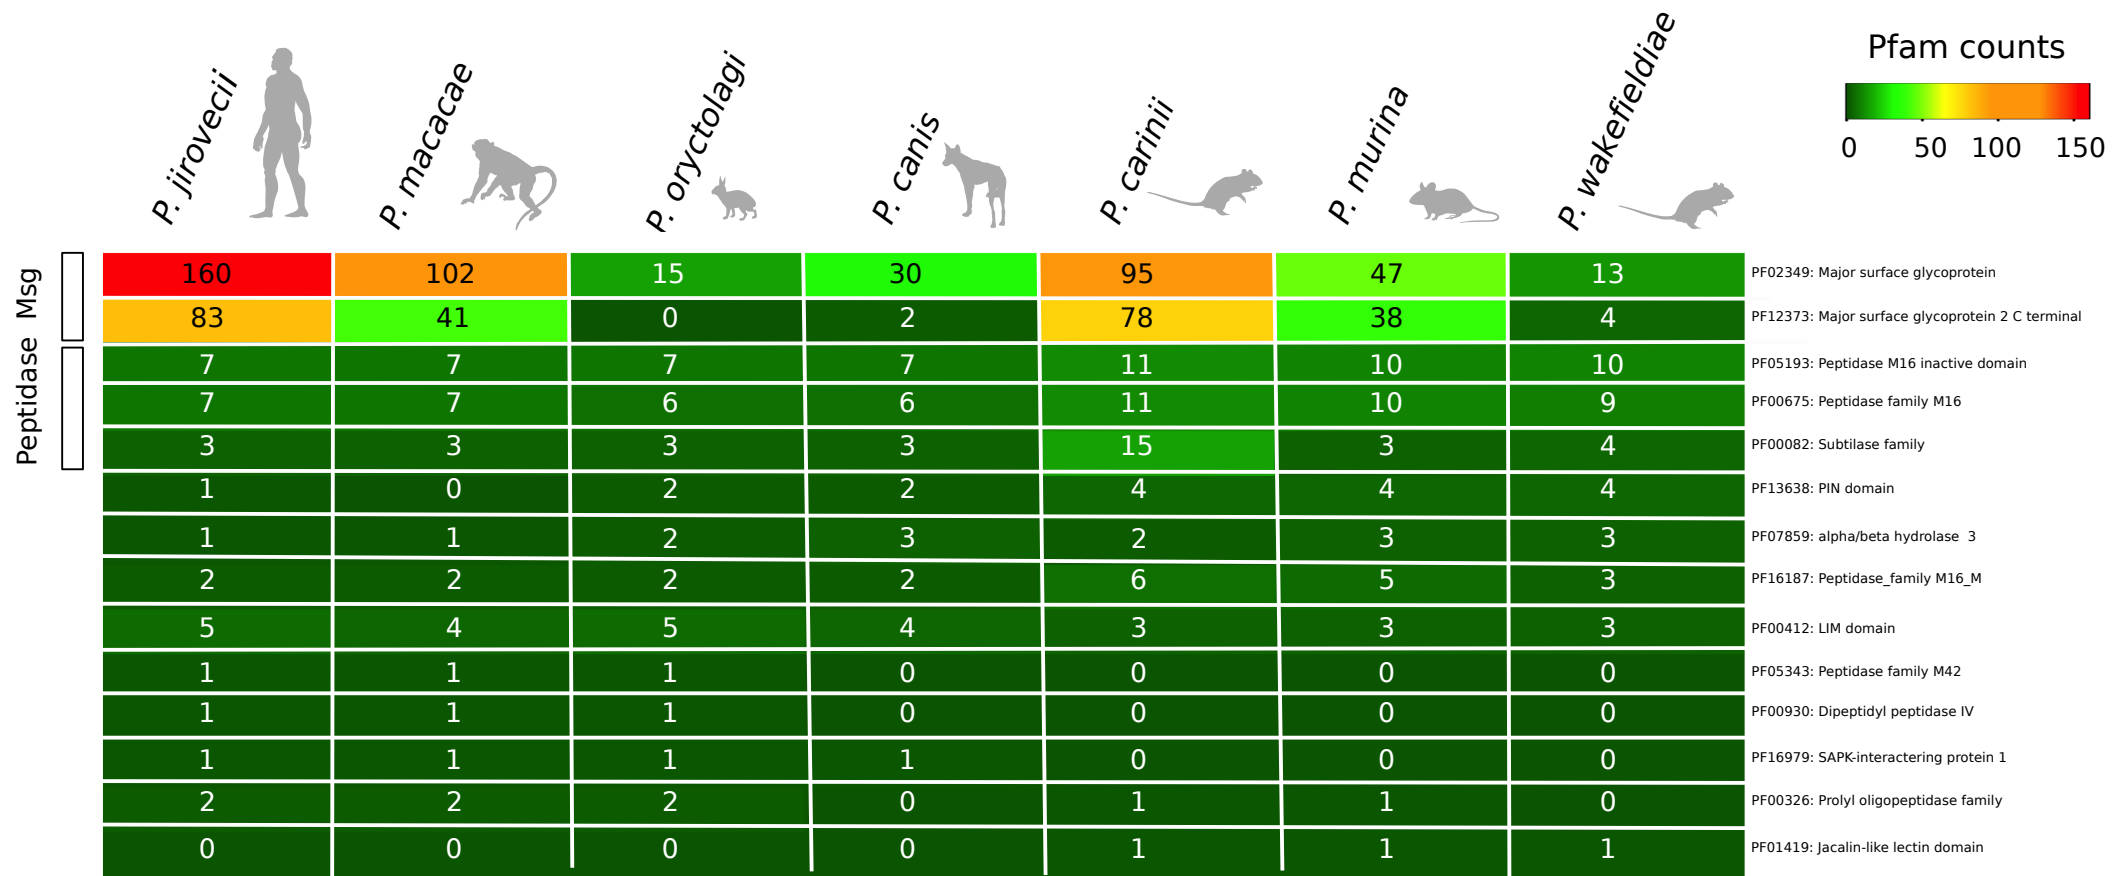

b

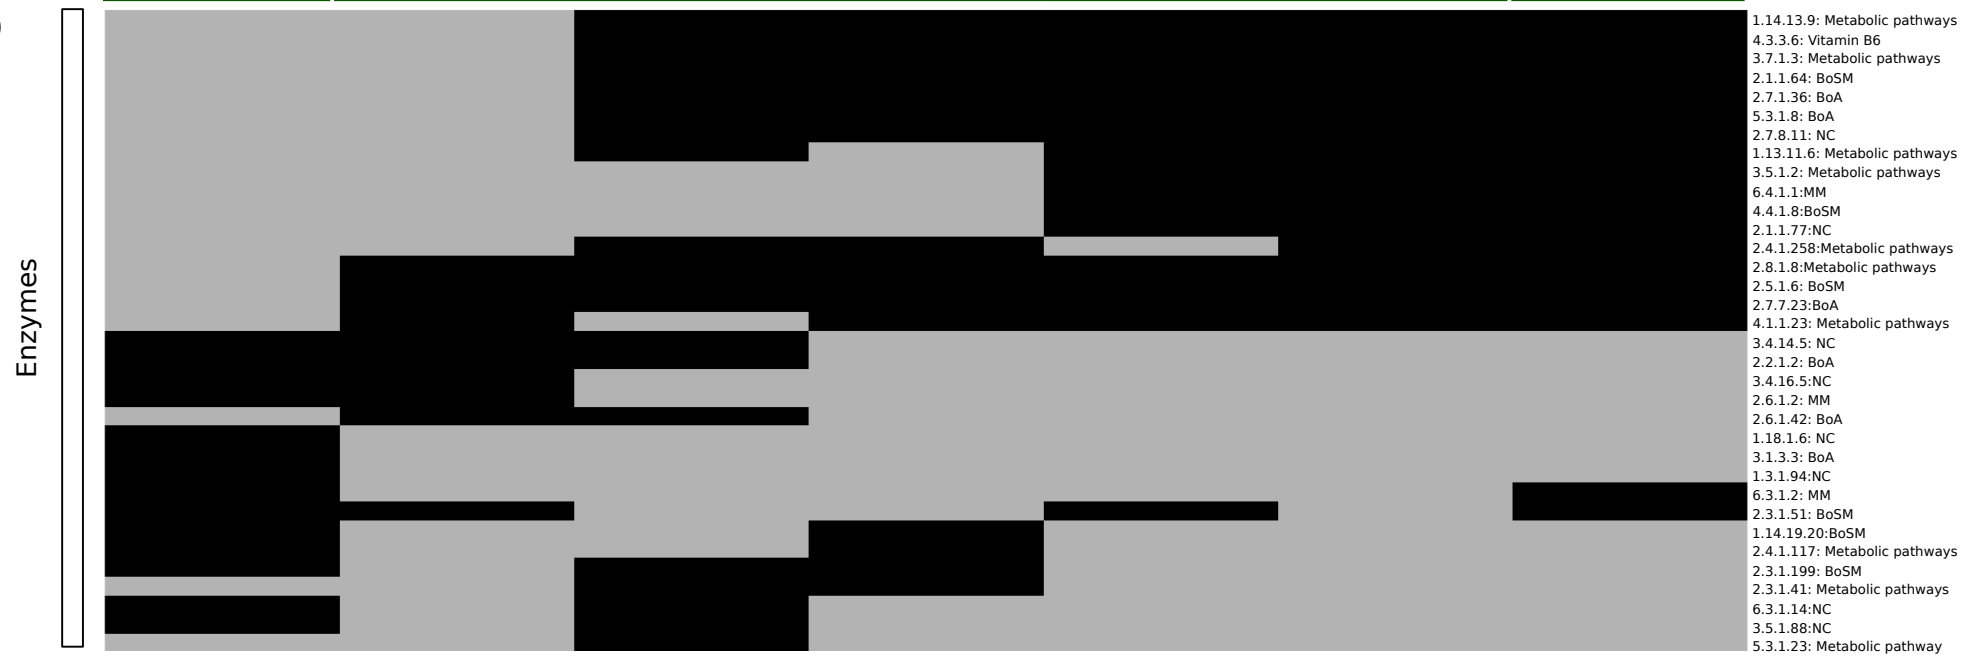

a

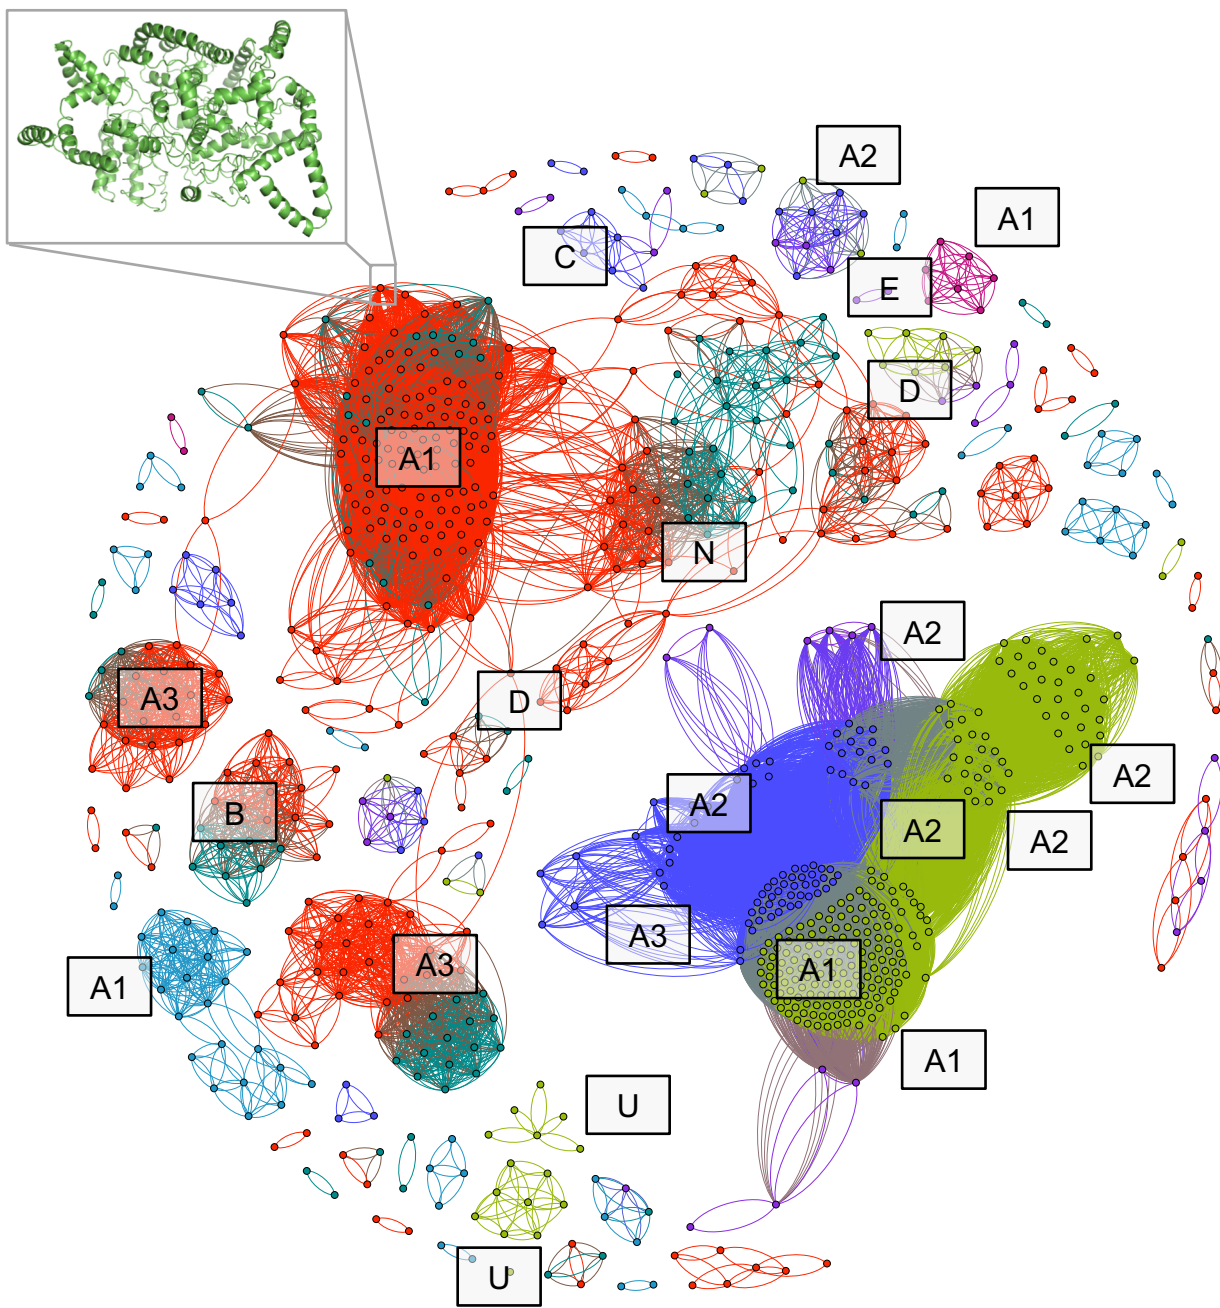*P. jirovecii**P. macacae**P. oryctolagi**P. canis**P. carinii**P. murina**P. wakefieldiae*

b

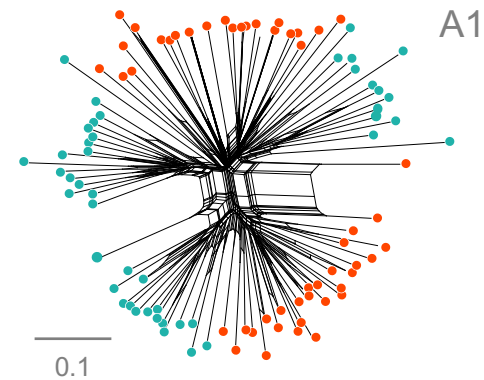

A1

c

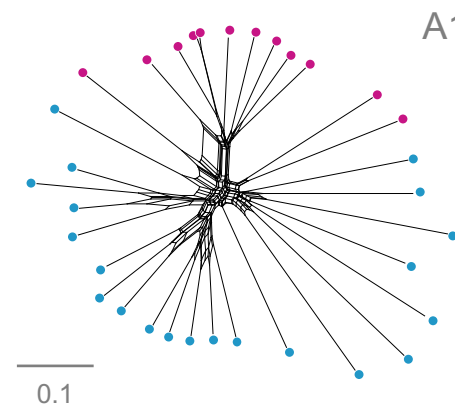

A1

d

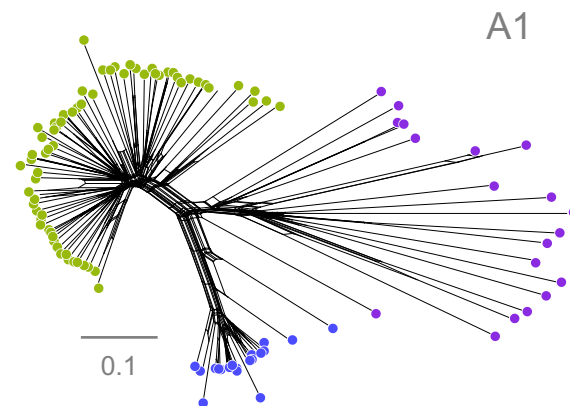

A1



|                        | N1 | M1  | M2 | M3 | M4 | M5 | C1 |
|------------------------|----|-----|----|----|----|----|----|
| <i>P. jirovecii</i>    | 51 | 91  | 83 | 72 | 69 | 64 | 61 |
| <i>P. macacae</i>      | 46 | 125 | 95 | 64 | 88 | 86 | 87 |
| <i>P. oryctolagi</i>   | 9  | 16  | 17 | 9  | 5  | 2  | 9  |
| <i>P. canis</i>        | 5  | 29  | 24 | 19 | 11 | 5  | 20 |
| <i>P. carinii</i>      | 84 | 65  | 68 | 56 | 57 | 54 | 51 |
| <i>P. murina</i>       | 54 | 22  | 34 | 19 | 28 | 29 | 24 |
| <i>P. wakefieldiae</i> | 12 | 5   | 8  | 2  | 3  | 5  | 5  |

**b**

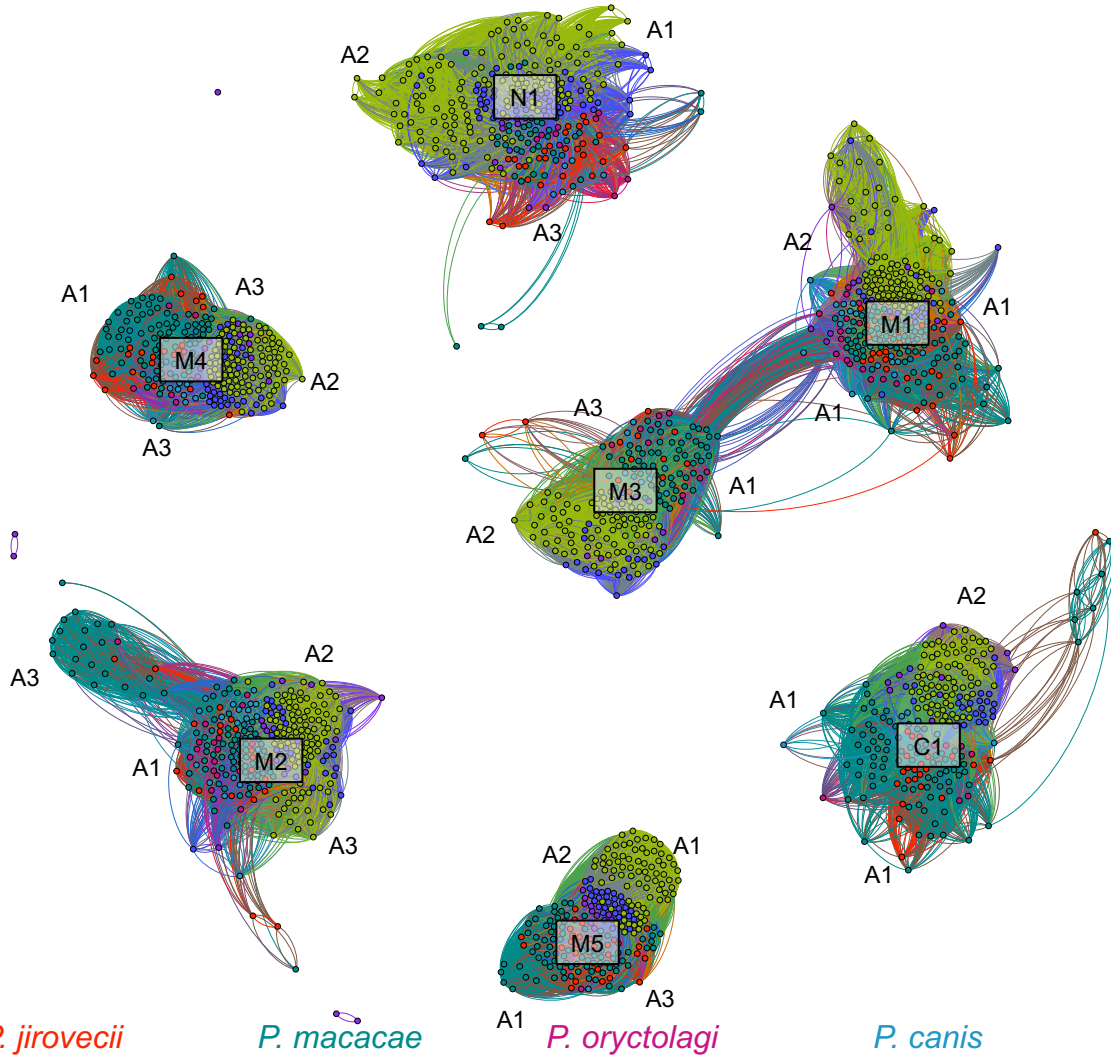

**c**

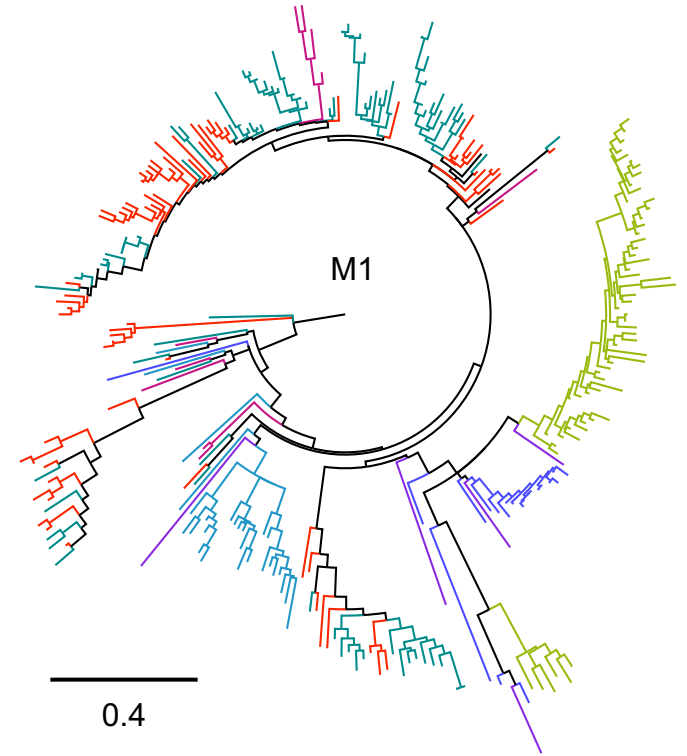

*P. jirovecii*

*P. macacae*

*P. oryctolagi*

*P. canis*

*P. carinii*

*P. murina*

*P. wakefieldiae*

Split of *Pneumocystis* genus

Divergence into humans- and macaques-infecting lineages

300 200 137 70 58 38 22 Time before present (Mya)

\*E \*B \*C \*D \*A1 \*A2 \*A3

**A1** **A3** **D** **R**  
B C E K 

**A1** **A3** **D**  
B C E K 

**A1** **A3** C D E K 

**A1** **E**  
A3 C D K 

**A1** **A2** **K**  
C D E 

**A1** **A2** **C**  
D E K 

**A1** **A2** **C**  
D E K 

Recombination in the msg-A family

Intron expansion

CFEM domain expansion

Genome reduction (~40%)

-  Origin (molecular clock dating)
-  Involved in antigenic variation
-  Mostly secreted
-  Mostly transmembrane
